# Supplementary material for: Comparative transcriptional profiling of the early host response to infection by typhoidal and non-typhoidal Salmonella serovars in human intestinal organoids
Source: PubMed Central journal article supplement (PMC8570492; doi:10.1371/journal.ppat.1009987), 2021-10-20
Supplement: ppat.1009987.s011.pdf [file ppat.1009987.s011.pdf]

**Table S3: Reactome Pathways Upregulated 2.5h pi**

| Description                                                                  | STM        |          | SE         |          | ST         |          |
|------------------------------------------------------------------------------|------------|----------|------------|----------|------------|----------|
|                                                                              | gene ratio | p-value  | gene ratio | p-value  | gene ratio | p-value  |
| Cytokine Signaling in Immune system                                          | 0.2194767  | 4.65E-28 | 0.2063953  | 1.81E-16 | 0.1802326  | 1.32E-10 |
| Signaling by Interleukins                                                    | 0.2359307  | 7.40E-23 | 0.2121212  | 2.44E-12 | 0.2012987  | 8.93E-11 |
| Toll Like Receptor 3 (TLR3) Cascade                                          | 0.4141414  | 1.68E-18 | 0.3030303  | 4.04E-08 | 0.2525253  | 1.58E-05 |
| MyD88-independent TLR4 cascade                                               | 0.41       | 2.62E-18 | 0.3        | 5.21E-08 | 0.26       | 6.08E-06 |
| TRIF(TICAM1)-mediated TLR4 signaling                                         | 0.41       | 2.62E-18 | 0.3        | 5.21E-08 | 0.26       | 6.08E-06 |
| Toll Like Receptor 4 (TLR4) Cascade                                          | 0.3384615  | 7.70E-16 | 0.2615385  | 2.80E-07 | 0.2384615  | 5.73E-06 |
| TRAF6 mediated induction of NFkB and MAP kinases upon TLR7/8 or 9 activation | 0.3870968  | 2.74E-15 | 0.2795699  | 1.80E-06 | 0.2365591  | 0.00014  |
| Toll Like Receptor 7/8 (TLR7/8) Cascade                                      | 0.3829787  | 4.08E-15 | 0.2765957  | 2.24E-06 | 0.2340426  | 0.00017  |
| MyD88 dependent cascade initiated on endosome                                | 0.3829787  | 4.08E-15 | 0.2765957  | 2.24E-06 | 0.2340426  | 0.00017  |
| Toll Like Receptor 9 (TLR9) Cascade                                          | 0.3673469  | 1.87E-14 | 0.2755102  | 1.56E-06 | 0.2244898  | 0.00032  |
| MyD88:MAL(TIRAP) cascade initiated on plasma membrane                        | 0.3684211  | 3.92E-14 | 0.2631579  | 9.23E-06 | 0.2315789  | 0.0002   |
| Toll Like Receptor TLR6:TLR2 Cascade                                         | 0.3684211  | 3.92E-14 | 0.2631579  | 9.23E-06 | 0.2315789  | 0.0002   |
| Toll-like Receptor Cascades                                                  | 0.2967742  | 4.54E-14 | 0.2387097  | 9.99E-07 | 0.2064516  | 8.89E-05 |
| Toll Like Receptor TLR1:TLR2 Cascade                                         | 0.3571429  | 1.16E-13 | 0.255102   | 1.66E-05 | 0.2244898  | 0.00032  |
| Toll Like Receptor 2 (TLR2) Cascade                                          | 0.3571429  | 1.16E-13 | 0.255102   | 1.66E-05 | 0.2244898  | 0.00032  |
| Toll Like Receptor 10 (TLR10) Cascade                                        | 0.3764706  | 2.44E-13 | 0.2705882  | 1.27E-05 | 0.2352941  | 0.00031  |
| Toll Like Receptor 5 (TLR5) Cascade                                          | 0.3764706  | 2.44E-13 | 0.2705882  | 1.27E-05 | 0.2352941  | 0.00031  |
| MyD88 cascade initiated on plasma membrane                                   | 0.3764706  | 2.44E-13 | 0.2705882  | 1.27E-05 | 0.2352941  | 0.00031  |
| Interleukin-17 signaling                                                     | 0.3888889  | 3.04E-12 | 0.2638889  | 0.0001   | 0.2361111  | 0.00081  |
| MAP kinase activation                                                        | 0.40625    | 5.56E-12 | 0.265625   | 0.00022  | 0.234375   | 0.00175  |
| RAF-independent MAPK1/3 activation                                           | 0.6086957  | 5.61E-10 | 0.4782609  | 6.26E-06 | 0.3478261  | 0.00146  |
| Interleukin-10 signaling                                                     | 0.4255319  | 5.90E-10 | 0.4042553  | 7.71E-08 | 0.3617021  | 1.96E-06 |
| Death Receptor Signalling                                                    | 0.2624113  | 7.12E-10 | 0.248227   | 7.31E-07 | 0.177305   | 0.00464  |
| TICAM1-dependent activation of IRF3/IRF7                                     | 0.8333333  | 1.45E-09 | 0.5        | 0.00067  | 0.3333333  | 0.0281   |
| Interleukin-4 and Interleukin-13 signaling                                   | 0.287037   | 1.62E-09 | 0.287037   | 9.68E-08 | 0.2592593  | 2.86E-06 |
| Interleukin-1 family signaling                                               | 0.2446043  | 2.42E-08 | 0.1726619  | 0.00901  | 0.1942446  | 0.00084  |
| DDX58/IFIH1-mediated induction of interferon-alpha/beta                      | 0.3076923  | 2.55E-08 | 0.2307692  | 0.00091  | 0.2307692  | 0.00077  |
| TAK1 activates NFkB by phosphorylation and activation of IKKs complex        | 0.4545455  | 2.88E-08 | 0.2424242  | 0.01771  | 0.2727273  | 0.00493  |
| Interleukin-1 signaling                                                      | 0.2718447  | 3.69E-08 | 0.1747573  | 0.0194   | 0.184466   | 0.00826  |
| Signaling by the B Cell Receptor (BCR)                                       | 0.2589286  | 6.83E-08 | 0.1875     | 0.00547  | 0.1785714  | 0.00982  |

|                                                                                             |           |          |           |          |           |          |
|---------------------------------------------------------------------------------------------|-----------|----------|-----------|----------|-----------|----------|
| MAPK family signaling cascades                                                              | 0.1843003 | 1.01E-07 | 0.1501706 | 0.00819  | 0.1501706 | 0.00645  |
| Interferon Signaling                                                                        | 0.2081218 | 1.24E-07 | 0.2081218 | 1.09E-05 | 0.1522843 | 0.01825  |
| p75NTR signals via NF-kB                                                                    | 0.625     | 1.27E-07 | 0.5       | 8.17E-05 | 0.375     | 0.00378  |
| NF-kB is activated and signals survival                                                     | 0.6923077 | 1.54E-07 | 0.5384615 | 0.00013  | 0.3846154 | 0.00726  |
| Ovarian tumor domain proteases                                                              | 0.3947368 | 2.82E-07 | 0.2631579 | 0.00453  | 0.2631579 | 0.00411  |
| ZBP1(DAI) mediated induction of type I IFNs                                                 | 0.5238095 | 3.47E-07 | 0.4285714 | 0.00013  | 0.4285714 | 0.00012  |
| Negative regulators of DDX58/IFIH1 signaling                                                | 0.4117647 | 3.80E-07 | 0.2941176 | 0.00185  | 0.2647059 | 0.00611  |
| Activation of IRF3/IRF7 mediated by TBK1/IKK epsilon                                        | 0.5555556 | 5.87E-07 | 0.2777778 | 0.03303  | 0.2222222 | 0.10631  |
| Negative regulation of MAPK pathway                                                         | 0.375     | 6.21E-07 | 0.175     | 0.11741  | 0.15      | 0.22485  |
| Downstream signaling events of B Cell Receptor (BCR)                                        | 0.2650602 | 1.69E-06 | 0.1686747 | 0.04726  | 0.1807229 | 0.0211   |
| TICAM1, RIP1-mediated IKK complex recruitment                                               | 0.5       | 2.10E-06 | 0.3       | 0.01364  | 0.25      | 0.04779  |
| Nucleotide-binding domain, leucine rich repeat containing receptor (NLR) signaling pathways | 0.3090909 | 2.59E-06 | 0.2363636 | 0.00361  | 0.2545455 | 0.00105  |
| Neutrophil degranulation                                                                    | 0.1503132 | 3.26E-06 | 0.1085595 | 0.40075  | 0.1189979 | 0.13426  |
| RIP-mediated NFkB activation via ZBP1                                                       | 0.5294118 | 3.77E-06 | 0.4705882 | 0.00014  | 0.5294118 | 1.41E-05 |
| TICAM1, TRAF6-dependent induction of TAK1 complex                                           | 0.5294118 | 3.77E-06 | 0.1764706 | 0.25847  | 0.2352941 | 0.08965  |
| IRAK2 mediated activation of TAK1 complex upon TLR7/8 or 9 stimulation                      | 0.5294118 | 3.77E-06 | 0.1764706 | 0.25847  | 0.2352941 | 0.08965  |
| Adaptive Immune System                                                                      | 0.1349206 | 4.86E-06 | 0.1455026 | 0.00014  | 0.1269841 | 0.01573  |
| NOD1/2 Signaling Pathway                                                                    | 0.3611111 | 5.73E-06 | 0.2222222 | 0.02922  | 0.25      | 0.00909  |
| Regulation of necroptotic cell death                                                        | 0.5       | 6.96E-06 | 0.2777778 | 0.03303  | 0.1666667 | 0.28082  |
| TRAF6-mediated induction of TAK1 complex within TLR4 complex                                | 0.5       | 6.96E-06 | 0.1666667 | 0.28807  | 0.2222222 | 0.10631  |
| p75 NTR receptor-mediated signalling                                                        | 0.2371134 | 7.76E-06 | 0.2371134 | 0.00012  | 0.1649485 | 0.03832  |
| SMAD2/SMAD3:SMAD4 heterotrimer regulates transcription                                      | 0.375     | 8.37E-06 | 0.15625   | 0.23709  | 0.15625   | 0.22848  |
| Interleukin-6 signaling                                                                     | 0.6363636 | 9.43E-06 | 0.5454545 | 0.00037  | 0.5454545 | 0.00034  |
| Regulated proteolysis of p75NTR                                                             | 0.6363636 | 9.43E-06 | 0.3636364 | 0.02133  | 0.1818182 | 0.315    |
| Transcriptional activity of SMAD2/SMAD3:SMAD4 heterotrimer                                  | 0.3181818 | 1.36E-05 | 0.1818182 | 0.0822   | 0.2045455 | 0.03261  |
| PIP3 activates AKT signaling                                                                | 0.1692308 | 1.54E-05 | 0.1576923 | 0.00453  | 0.1807692 | 8.13E-05 |
| activated TAK1 mediates p38 MAPK activation                                                 | 0.4166667 | 1.61E-05 | 0.1666667 | 0.23679  | 0.1666667 | 0.22925  |
| Diseases of Immune System                                                                   | 0.4166667 | 1.61E-05 | 0.375     | 0.00043  | 0.375     | 0.00039  |
| Diseases associated with the TLR signaling cascade                                          | 0.4166667 | 1.61E-05 | 0.375     | 0.00043  | 0.375     | 0.00039  |
| Interleukin-6 family signaling                                                              | 0.4166667 | 1.61E-05 | 0.375     | 0.00043  | 0.375     | 0.00039  |

|                                                                                     |           |          |           |         |           |          |
|-------------------------------------------------------------------------------------|-----------|----------|-----------|---------|-----------|----------|
| TRAF6 mediated NF-kB activation                                                     | 0.4166667 | 1.61E-05 | 0.3333333 | 0.00218 | 0.375     | 0.00039  |
| Interferon alpha/beta signaling                                                     | 0.2608696 | 1.87E-05 | 0.1884058 | 0.02461 | 0.1594203 | 0.09335  |
| Signaling by TGF-beta family members                                                | 0.2254902 | 1.87E-05 | 0.1764706 | 0.01768 | 0.1568627 | 0.05676  |
| RIPK1-mediated regulated necrosis                                                   | 0.45      | 2.05E-05 | 0.25      | 0.05025 | 0.15      | 0.33962  |
| Regulated Necrosis                                                                  | 0.45      | 2.05E-05 | 0.25      | 0.05025 | 0.15      | 0.33962  |
| NRIF signals cell death from the nucleus                                            | 0.5       | 2.31E-05 | 0.25      | 0.07746 | 0.125     | 0.5012   |
| MAP3K8 (TPL2)-dependent MAPK1/3 activation                                          | 0.5       | 2.31E-05 | 0.25      | 0.07746 | 0.1875    | 0.22313  |
| IKK complex recruitment mediated by RIP1                                            | 0.4       | 2.48E-05 | 0.2       | 0.11223 | 0.16      | 0.25247  |
| Interleukin-12 family signaling                                                     | 0.2758621 | 2.54E-05 | 0.2586207 | 0.00068 | 0.1551724 | 0.13737  |
| TNFR1-induced NFkappaB signaling pathway                                            | 0.3666667 | 2.56E-05 | 0.2333333 | 0.03149 | 0.2666667 | 0.00911  |
| MAPK targets/ Nuclear events mediated by MAP kinases                                | 0.3548387 | 3.66E-05 | 0.3548387 | 0.00018 | 0.2580645 | 0.0112   |
| ERKs are inactivated                                                                | 0.5384615 | 4.19E-05 | 0.2307692 | 0.14694 | 0.1538462 | 0.39285  |
| p75NTR recruits signalling complexes                                                | 0.5384615 | 4.19E-05 | 0.3846154 | 0.0077  | 0.2307692 | 0.14256  |
| MAPK1/MAPK3 signaling                                                               | 0.1653543 | 4.20E-05 | 0.1377953 | 0.05225 | 0.1299213 | 0.09456  |
| CLEC7A (Dectin-1) signaling                                                         | 0.2178218 | 4.98E-05 | 0.1485149 | 0.10122 | 0.1584158 | 0.05266  |
| TNF signaling                                                                       | 0.3023256 | 5.08E-05 | 0.2093023 | 0.03076 | 0.1860465 | 0.06907  |
| IRAK2 mediated activation of TAK1 complex                                           | 0.6       | 6.92E-05 | 0.1       | 0.66787 | 0.2       | 0.27514  |
| Regulation of TNFR1 signaling                                                       | 0.3333333 | 7.10E-05 | 0.2727273 | 0.0054  | 0.2121212 | 0.04729  |
| Cytosolic sensors of pathogen-associated DNA                                        | 0.2539683 | 7.66E-05 | 0.2222222 | 0.00469 | 0.2222222 | 0.00414  |
| Membrane binding and targetting of GAG proteins                                     | 0.5       | 7.74E-05 | NA        | NA      | 0.0714286 | 0.78155  |
| Synthesis And Processing Of GAG, GAGPOL Polyproteins                                | 0.5       | 7.74E-05 | NA        | NA      | 0.0714286 | 0.78155  |
| Downregulation of SMAD2/3:SMAD4 transcriptional activity                            | 0.3913043 | 7.81E-05 | 0.2608696 | 0.02712 | 0.2608696 | 0.02553  |
| JNK (c-Jun kinases) phosphorylation and activation mediated by activated human TAK1 | 0.3913043 | 7.81E-05 | 0.0869565 | 0.70843 | 0.173913  | 0.20661  |
| Circadian Clock                                                                     | 0.2428571 | 8.48E-05 | 0.2428571 | 0.00067 | 0.2857143 | 1.58E-05 |
| Fc epsilon receptor (FCERI) signaling                                               | 0.1940299 | 8.71E-05 | 0.1343284 | 0.15785 | 0.1641791 | 0.01813  |
| Signaling by Receptor Tyrosine Kinases                                              | 0.1406593 | 9.20E-05 | 0.1582418 | 0.00018 | 0.1450549 | 0.00238  |
| Budding and maturation of HIV virion                                                | 0.3448276 | 0.00011  | 0.1034483 | 0.59534 | 0.0689655 | 0.81482  |
| Downstream signal transduction                                                      | 0.3448276 | 0.00011  | 0.2758621 | 0.00795 | 0.3793103 | 7.82E-05 |
| Interferon gamma signaling                                                          | 0.2173913 | 0.00011  | 0.1956522 | 0.00618 | 0.1956522 | 0.00536  |
| Diseases of signal transduction                                                     | 0.1455026 | 0.00012  | 0.1269841 | 0.08603 | 0.1481481 | 0.00312  |
| IRAK1 recruits IKK complex                                                          | 0.4666667 | 0.00013  | 0.2       | 0.20085 | 0.1333333 | 0.46644  |
| IRAK1 recruits IKK complex upon TLR7/8 or 9 stimulation                             | 0.4666667 | 0.00013  | 0.2       | 0.20085 | 0.1333333 | 0.46644  |
| Intracellular signaling by second messengers                                        | 0.1535836 | 0.00014  | 0.1569966 | 0.00299 | 0.1740614 | 0.00011  |

|                                                               |           |         |           |         |           |          |
|---------------------------------------------------------------|-----------|---------|-----------|---------|-----------|----------|
| Interleukin-27 signaling                                      | 0.5454545 | 0.00014 | 0.5454545 | 0.00037 | 0.2727273 | 0.09574  |
| Signaling by TGF-beta Receptor Complex                        | 0.2328767 | 0.00015 | 0.1780822 | 0.03736 | 0.1780822 | 0.03394  |
| Transcriptional Regulation by TP53                            | 0.1452055 | 0.00016 | 0.1616438 | 0.00039 | 0.1315068 | 0.04413  |
| Nuclear Events (kinase and transcription factor activation)   | 0.36      | 0.00017 | 0.32      | 0.00292 | 0.24      | 0.03755  |
| Activation of NF-kappaB in B cells                            | 0.238806  | 0.00017 | 0.1492537 | 0.15627 | 0.1641791 | 0.07911  |
| TNFR2 non-canonical NF-kB pathway                             | 0.2058824 | 0.00017 | 0.1470588 | 0.10785 | 0.1176471 | 0.35696  |
| Interleukin-3, Interleukin-5 and GM-CSF signaling             | 0.2708333 | 0.00018 | 0.1458333 | 0.23014 | 0.2708333 | 0.00084  |
| Programmed Cell Death                                         | 0.1744186 | 0.0002  | 0.127907  | 0.18356 | 0.1162791 | 0.31516  |
| MAPK6/MAPK4 signaling                                         | 0.2134831 | 0.00021 | 0.1123596 | 0.45212 | 0.1573034 | 0.07009  |
| FCER1 mediated NF-kB activation                               | 0.2195122 | 0.00021 | 0.1097561 | 0.48877 | 0.1341463 | 0.2195   |
| Assembly Of The HIV Virion                                    | 0.4375    | 0.00022 | NA        | NA      | 0.0625    | 0.82425  |
| Regulation of TP53 Expression and Degradation                 | 0.2972973 | 0.00023 | 0.2162162 | 0.03399 | 0.2162162 | 0.03164  |
| RAF/MAP kinase cascade                                        | 0.1572581 | 0.00023 | 0.1330645 | 0.08498 | 0.125     | 0.14643  |
| TP53 Regulates Transcription of Death Receptors and Ligands   | 0.5       | 0.00026 | 0.4166667 | 0.00518 | 0.1666667 | 0.35435  |
| Interleukin-35 Signalling                                     | 0.5       | 0.00026 | 0.5       | 0.00067 | 0.25      | 0.11828  |
| TGF-beta receptor signaling activates SMADs                   | 0.3125    | 0.00028 | 0.21875   | 0.04342 | 0.21875   | 0.04074  |
| TP53 Regulates Transcription of Cell Death Genes              | 0.2727273 | 0.00029 | 0.2272727 | 0.01341 | 0.2045455 | 0.03261  |
| Apoptosis                                                     | 0.1715976 | 0.00033 | 0.1242604 | 0.22859 | 0.112426  | 0.37705  |
| IL-6-type cytokine receptor ligand interactions               | 0.4117647 | 0.00035 | 0.4117647 | 0.001   | 0.2941176 | 0.02467  |
| Signaling by MET                                              | 0.2151899 | 0.00041 | 0.1392405 | 0.19753 | 0.1518987 | 0.10873  |
| Signaling by Activin                                          | 0.4615385 | 0.00045 | 0.3076923 | 0.03906 | 0.1538462 | 0.39285  |
| Chemokine receptors bind chemokines                           | 0.25      | 0.00069 | 0.2083333 | 0.02418 | 0.2291667 | 0.00826  |
| Interleukin-12 signaling                                      | 0.25      | 0.00069 | 0.2291667 | 0.00913 | 0.125     | 0.37253  |
| Regulation of IFNG signaling                                  | 0.4285714 | 0.00073 | 0.4285714 | 0.00182 | 0.4285714 | 0.0017   |
| TRAF3-dependent IRF activation pathway                        | 0.4285714 | 0.00073 | 0.3571429 | 0.01096 | 0.5       | 0.00021  |
| ER-Phagosome pathway                                          | 0.2048193 | 0.00074 | 0.060241  | 0.94299 | 0.0843373 | 0.76367  |
| RHO GTPases activate IQGAPs                                   | 0.3       | 0.00078 | 0.2666667 | 0.00988 | 0.1333333 | 0.37311  |
| Regulation of TP53 Degradation                                | 0.2777778 | 0.00079 | 0.1944444 | 0.07509 | 0.1944444 | 0.07079  |
| Cell junction organization                                    | 0.1978022 | 0.00081 | 0.1868132 | 0.01214 | 0.0989011 | 0.60135  |
| Transcriptional regulation of white adipocyte differentiation | 0.202381  | 0.00085 | 0.1904762 | 0.01227 | 0.3690476 | 6.93E-11 |
| Antigen processing-Cross presentation                         | 0.1919192 | 0.00086 | 0.0707071 | 0.90303 | 0.0808081 | 0.81202  |
| MAPK3 (ERK1) activation                                       | 0.5       | 0.00089 | 0.4       | 0.01477 | 0.3       | 0.07518  |
| Interleukin-20 family signaling                               | 0.32      | 0.00095 | 0.36      | 0.00061 | 0.28      | 0.01093  |

|                                                                                                |           |         |           |         |           |          |
|------------------------------------------------------------------------------------------------|-----------|---------|-----------|---------|-----------|----------|
| Antiviral mechanism by IFN-stimulated genes                                                    | 0.2051282 | 0.00103 | 0.2051282 | 0.00597 | 0.1025641 | 0.559    |
| PTEN Regulation                                                                                | 0.1714286 | 0.00106 | 0.1642857 | 0.01836 | 0.1785714 | 0.00421  |
| TRAF6 mediated IRF7 activation in TLR7/8 or 9 signaling                                        | 0.4       | 0.00112 | 0.0666667 | 0.80867 | NA        | NA       |
| Intrinsic Pathway for Apoptosis                                                                | 0.25      | 0.00115 | 0.25      | 0.00456 | 0.1818182 | 0.07717  |
| Downregulation of TGF-beta receptor signaling                                                  | 0.3076923 | 0.00127 | 0.2307692 | 0.04734 | 0.1923077 | 0.12226  |
| Signaling by PDGF                                                                              | 0.2241379 | 0.00127 | 0.137931  | 0.25499 | 0.2241379 | 0.00521  |
| C-type lectin receptors (CLRs)                                                                 | 0.1690141 | 0.0013  | 0.1267606 | 0.22399 | 0.1619718 | 0.01853  |
| Signaling by ERBB4                                                                             | 0.2444444 | 0.0014  | 0.1333333 | 0.32724 | 0.1777778 | 0.08582  |
| Signaling by Leptin                                                                            | 0.4545455 | 0.00152 | 0.4545455 | 0.0033  | 0.5454545 | 0.00034  |
| NOTCH4 Activation and Transmission of Signal to the Nucleus                                    | 0.4545455 | 0.00152 | 0.2727273 | 0.09889 | NA        | NA       |
| Spry regulation of FGF signaling                                                               | 0.375     | 0.00167 | NA        | NA      | 0.3125    | 0.01899  |
| ERK/MAPK targets                                                                               | 0.3181818 | 0.00206 | 0.2727273 | 0.02193 | 0.1818182 | 0.18466  |
| NOTCH2 Activation and Transmission of Signal to the Nucleus                                    | 0.3181818 | 0.00206 | 0.1818182 | 0.19112 | NA        | NA       |
| Regulation of signaling by CBL                                                                 | 0.3181818 | 0.00206 | 0.1363636 | 0.4069  | 0.2272727 | 0.06849  |
| Signaling by PTK6                                                                              | 0.2222222 | 0.00209 | 0.1666667 | 0.10485 | 0.1481481 | 0.18688  |
| Signaling by Non-Receptor Tyrosine Kinases                                                     | 0.2222222 | 0.00209 | 0.1666667 | 0.10485 | 0.1481481 | 0.18688  |
| Membrane Trafficking                                                                           | 0.1210191 | 0.00219 | 0.1066879 | 0.44111 | 0.1130573 | 0.21125  |
| Cell death signalling via NRAGE, NRIF and NADE                                                 | 0.1973684 | 0.00219 | 0.2105263 | 0.00459 | 0.1184211 | 0.38071  |
| Caspase activation via Death Receptors in the presence of ligand                               | 0.3529412 | 0.00238 | 0.2352941 | 0.09328 | 0.1176471 | 0.53446  |
| ISG15 antiviral mechanism                                                                      | 0.1971831 | 0.00306 | 0.2112676 | 0.00575 | 0.0985915 | 0.60554  |
| TNF receptor superfamily (TNFSF) members mediating non-canonical NF-kB pathway                 | 0.3333333 | 0.00331 | 0.3333333 | 0.00783 | 0.2777778 | 0.03134  |
| TCR signaling                                                                                  | 0.1680672 | 0.0034  | 0.1008403 | 0.59437 | 0.1344538 | 0.1609   |
| Regulation of lipid metabolism by Peroxisome proliferator-activated receptor alpha (PPARalpha) | 0.1680672 | 0.0034  | 0.1260504 | 0.257   | 0.2521008 | 2.40E-06 |
| Activation of BH3-only proteins                                                                | 0.2666667 | 0.00347 | 0.3       | 0.00267 | 0.2       | 0.08142  |
| Cellular responses to stress                                                                   | 0.1267606 | 0.00357 | 0.1361502 | 0.02    | 0.0985915 | 0.64168  |
| Signaling by Erythropoietin                                                                    | 0.2916667 | 0.00358 | 0.25      | 0.03307 | 0.2916667 | 0.00862  |
| Growth hormone receptor signaling                                                              | 0.2916667 | 0.00358 | 0.2916667 | 0.00928 | 0.25      | 0.03116  |
| Dissolution of Fibrin Clot                                                                     | 0.3846154 | 0.00364 | 0.2307692 | 0.14694 | 0.1538462 | 0.39285  |
| Cell-Cell communication                                                                        | 0.1627907 | 0.00403 | 0.1627907 | 0.02575 | 0.1162791 | 0.34824  |
| Activated NOTCH1 Transmits Signal to the Nucleus                                               | 0.2580645 | 0.00433 | 0.1935484 | 0.09747 | 0.0322581 | 0.96565  |
| Negative regulation of FGFR4 signaling                                                         | 0.2580645 | 0.00433 | 0.0645161 | 0.84888 | 0.2580645 | 0.0112   |

|                                                                                    |           |         |           |         |           |          |
|------------------------------------------------------------------------------------|-----------|---------|-----------|---------|-----------|----------|
| NOTCH3 Activation and Transmission of Signal to the Nucleus                        | 0.28      | 0.0046  | 0.16      | 0.26052 | 0.08      | 0.74422  |
| Antigen Presentation: Folding, assembly and peptide loading of class I MHC         | 0.28      | 0.0046  | 0.12      | 0.49212 | 0.12      | 0.48262  |
| Vesicle-mediated transport                                                         | 0.1169415 | 0.00477 | 0.107946  | 0.39546 | 0.1094453 | 0.30144  |
| Downstream TCR signaling                                                           | 0.1734694 | 0.00478 | 0.0918367 | 0.70611 | 0.1326531 | 0.20523  |
| Endosomal Sorting Complex Required For Transport (ESCRT)                           | 0.25      | 0.00533 | 0.03125   | 0.97072 | 0.03125   | 0.9692   |
| Gene and protein expression by JAK-STAT signaling after Interleukin-12 stimulation | 0.2307692 | 0.00565 | 0.2051282 | 0.04506 | 0.0769231 | 0.78009  |
| PPARA activates gene expression                                                    | 0.1623932 | 0.00621 | 0.1196581 | 0.33483 | 0.2393162 | 1.49E-05 |
| Regulation of TP53 Activity                                                        | 0.15      | 0.00642 | 0.16875   | 0.00796 | 0.15625   | 0.02203  |
| Signaling by NOTCH2                                                                | 0.2424242 | 0.00651 | 0.1818182 | 0.12319 | 0.0909091 | 0.67448  |
| Oncogene Induced Senescence                                                        | 0.2424242 | 0.00651 | 0.1818182 | 0.12319 | 0.1515152 | 0.24833  |
| Negative regulation of FGFR1 signaling                                             | 0.2424242 | 0.00651 | 0.1212121 | 0.4563  | 0.2424242 | 0.0164   |
| Nuclear signaling by ERBB4                                                         | 0.2592593 | 0.00728 | 0.1481481 | 0.30913 | 0.2222222 | 0.05268  |
| Caspase activation via extrinsic apoptotic signalling pathway                      | 0.2592593 | 0.00728 | 0.1481481 | 0.30913 | 0.1481481 | 0.30015  |
| Signaling by NOTCH1 HD Domain Mutants in Cancer                                    | 0.3333333 | 0.00732 | 0.2666667 | 0.06311 | NA        | NA       |
| Constitutive Signaling by NOTCH1 HD Domain Mutants                                 | 0.3333333 | 0.00732 | 0.2666667 | 0.06311 | NA        | NA       |
| Regulation of innate immune responses to cytosolic DNA                             | 0.3333333 | 0.00732 | 0.1333333 | 0.47391 | 0.1333333 | 0.46644  |
| Negative regulation of MET activity                                                | 0.2857143 | 0.00772 | 0.0952381 | 0.65947 | 0.1428571 | 0.36897  |
| Signaling by FGFR4                                                                 | 0.2195122 | 0.00797 | 0.097561  | 0.63195 | 0.2439024 | 0.00733  |
| MASTL Facilitates Mitotic Progression                                              | 0.4       | 0.00804 | 0.1       | 0.66787 | 0.1       | 0.66256  |
| Interleukin-21 signaling                                                           | 0.4       | 0.00804 | 0.3       | 0.07773 | 0.3       | 0.07518  |
| Cellular responses to external stimuli                                             | 0.1192843 | 0.00836 | 0.1292247 | 0.03902 | 0.0874751 | 0.8949   |
| Rho GTPase cycle                                                                   | 0.1521739 | 0.00882 | 0.1956522 | 0.00092 | 0.1449275 | 0.07236  |
| RAB geranylgeranylation                                                            | 0.1875    | 0.00891 | 0.0625    | 0.9126  | 0.0625    | 0.90694  |
| Transcriptional regulation by RUNX3                                                | 0.1666667 | 0.00898 | 0.1458333 | 0.1234  | 0.1979167 | 0.00376  |
| Pink/Parkin Mediated Mitophagy                                                     | 0.2727273 | 0.00984 | 0.0454545 | 0.91164 | 0.0909091 | 0.6771   |
| TGF-beta receptor signaling in EMT (epithelial to mesenchymal transition)          | 0.3125    | 0.00989 | 0.1875    | 0.22932 | 0.125     | 0.5012   |
| Glycogen storage diseases                                                          | 0.3125    | 0.00989 | NA        | NA      | 0.1875    | 0.22313  |
| Signaling by NOTCH1                                                                | 0.1780822 | 0.01025 | 0.2054795 | 0.00751 | 0.1506849 | 0.12617  |
| Signaling by FGFR1                                                                 | 0.2       | 0.0104  | 0.14      | 0.2628  | 0.2       | 0.02891  |
| Mitophagy                                                                          | 0.2413793 | 0.01097 | 0.0689655 | 0.82106 | 0.1034483 | 0.58559  |
| Negative regulation of FGFR3 signaling                                             | 0.2413793 | 0.01097 | 0.0344828 | 0.95922 | 0.2758621 | 0.00733  |

|                                                                                    |           |         |           |         |           |         |
|------------------------------------------------------------------------------------|-----------|---------|-----------|---------|-----------|---------|
| TRAF6 mediated IRF7 activation                                                     | 0.2413793 | 0.01097 | 0.1724138 | 0.17922 | 0.2068966 | 0.07103 |
| Signaling by NOTCH1 PEST Domain Mutants in Cancer                                  | 0.1896552 | 0.01103 | 0.1724138 | 0.07543 | 0.1551724 | 0.13737 |
| Signaling by NOTCH1 in Cancer                                                      | 0.1896552 | 0.01103 | 0.1724138 | 0.07543 | 0.1551724 | 0.13737 |
| Constitutive Signaling by NOTCH1 PEST Domain Mutants                               | 0.1896552 | 0.01103 | 0.1724138 | 0.07543 | 0.1551724 | 0.13737 |
| Signaling by NOTCH1 HD+PEST Domain Mutants in Cancer                               | 0.1896552 | 0.01103 | 0.1724138 | 0.07543 | 0.1551724 | 0.13737 |
| Constitutive Signaling by NOTCH1 HD+PEST Domain Mutants                            | 0.1896552 | 0.01103 | 0.1724138 | 0.07543 | 0.1551724 | 0.13737 |
| RAB GEFs exchange GTP for GDP on RABs                                              | 0.1666667 | 0.01119 | 0.1444444 | 0.14137 | 0.1222222 | 0.31977 |
| Rab regulation of trafficking                                                      | 0.1532258 | 0.0115  | 0.1370968 | 0.14645 | 0.1290323 | 0.20369 |
| Endosomal/Vacuolar pathway                                                         | 0.3636364 | 0.01176 | 0.0909091 | 0.70255 | 0.0909091 | 0.69731 |
| Regulation by c-FLIP                                                               | 0.3636364 | 0.01176 | 0.2727273 | 0.09889 | 0.0909091 | 0.69731 |
| Myoclonic epilepsy of Lafora                                                       | 0.3636364 | 0.01176 | NA        | NA      | 0.1818182 | 0.315   |
| Type I hemidesmosome assembly                                                      | 0.3636364 | 0.01176 | 0.4545455 | 0.0033  | 0.2727273 | 0.09574 |
| SUMOylation of immune response proteins                                            | 0.3636364 | 0.01176 | 0.4545455 | 0.0033  | 0.3636364 | 0.02036 |
| CASP8 activity is inhibited                                                        | 0.3636364 | 0.01176 | 0.2727273 | 0.09889 | 0.0909091 | 0.69731 |
| Dimerization of procaspase-8                                                       | 0.3636364 | 0.01176 | 0.2727273 | 0.09889 | 0.0909091 | 0.69731 |
| VEGFA-VEGFR2 Pathway                                                               | 0.1616162 | 0.01198 | 0.1818182 | 0.0132  | 0.1212121 | 0.3188  |
| Cyclin D associated events in G1                                                   | 0.2045455 | 0.01274 | 0.1136364 | 0.4912  | 0.0909091 | 0.67675 |
| G1 Phase                                                                           | 0.2045455 | 0.01274 | 0.1136364 | 0.4912  | 0.0909091 | 0.67675 |
| Transport of connexons to the plasma membrane                                      | 0.2941176 | 0.01302 | 0.4117647 | 0.001   | 0.1176471 | 0.53446 |
| Regulation of MECP2 expression and activity                                        | 0.2333333 | 0.01325 | 0.2       | 0.08579 | 0.3333333 | 0.00056 |
| Dectin-1 mediated noncanonical NF-kB signaling                                     | 0.1833333 | 0.01415 | 0.1       | 0.60624 | 0.1       | 0.59234 |
| HSP90 chaperone cycle for steroid hormone receptors (SHR)                          | 0.1886792 | 0.01556 | 0.245283  | 0.00255 | 0.0566038 | 0.92069 |
| Regulation of PTEN gene transcription                                              | 0.1803279 | 0.01594 | 0.2459016 | 0.00119 | 0.2131148 | 0.00813 |
| Josephin domain DUBs                                                               | 0.3333333 | 0.01644 | 0.0833333 | 0.73361 | NA        | NA      |
| NF-kB activation through FADD/RIP-1 pathway mediated by caspase-8 and -10          | 0.3333333 | 0.01644 | 0.3333333 | 0.02941 | 0.4166667 | 0.00488 |
| Signaling by NTRK1 (TRKA)                                                          | 0.1666667 | 0.01748 | 0.2435897 | 0.00032 | 0.1794872 | 0.02674 |
| RAF activation                                                                     | 0.24      | 0.01863 | 0.04      | 0.93656 | 0.16      | 0.25247 |
| Constitutive Signaling by AKT1 E17K in Cancer                                      | 0.24      | 0.01863 | 0.24      | 0.0398  | 0.16      | 0.25247 |
| Antigen activates B Cell Receptor (BCR) leading to generation of second messengers | 0.21875   | 0.0188  | 0.21875   | 0.04342 | 0.15625   | 0.22848 |
| Gap junction trafficking and regulation                                            | 0.1914894 | 0.01935 | 0.2978723 | 0.00021 | 0.106383  | 0.53888 |
| Regulation of mRNA stability by proteins that bind AU-rich elements                | 0.1590909 | 0.02048 | 0.1022727 | 0.57691 | 0.1363636 | 0.19085 |

|                                                                                                                                      |           |         |           |         |           |          |
|--------------------------------------------------------------------------------------------------------------------------------------|-----------|---------|-----------|---------|-----------|----------|
| Signaling by FGFR3                                                                                                                   | 0.2       | 0.02092 | 0.075     | 0.80253 | 0.25      | 0.00609  |
| Signaling by moderate kinase activity BRAF mutants                                                                                   | 0.2       | 0.02092 | 0.1       | 0.61206 | 0.1       | 0.60078  |
| Paradoxical activation of RAF signaling by kinase inactive BRAF                                                                      | 0.2       | 0.02092 | 0.1       | 0.61206 | 0.1       | 0.60078  |
| Constitutive Signaling by Ligand-Responsive EGFR Cancer Variants                                                                     | 0.2631579 | 0.02114 | 0.1052632 | 0.60413 | 0.1052632 | 0.59628  |
| Signaling by EGFR in Cancer                                                                                                          | 0.2631579 | 0.02114 | 0.1052632 | 0.60413 | 0.1052632 | 0.59628  |
| Signaling by Ligand-Responsive EGFR Variants in Cancer                                                                               | 0.2631579 | 0.02114 | 0.1052632 | 0.60413 | 0.1052632 | 0.59628  |
| LDL clearance                                                                                                                        | 0.2631579 | 0.02114 | 0.2105263 | 0.129   | 0.2631579 | 0.03904  |
| PI3K/AKT Signaling in Cancer                                                                                                         | 0.1546392 | 0.02138 | 0.1752577 | 0.02209 | 0.1752577 | 0.01957  |
| Hemostasis                                                                                                                           | 0.1112903 | 0.0221  | 0.1048387 | 0.50336 | 0.1064516 | 0.40247  |
| Initiation of Nuclear Envelope Reformation                                                                                           | 0.3076923 | 0.02213 | 0.1538462 | 0.39976 | 0.1538462 | 0.39285  |
| Nuclear Envelope Reassembly                                                                                                          | 0.3076923 | 0.02213 | 0.1538462 | 0.39976 | 0.1538462 | 0.39285  |
| Triglyceride biosynthesis                                                                                                            | 0.3076923 | 0.02213 | 0.0769231 | 0.76143 | 0.0769231 | 0.75646  |
| Erythropoietin activates RAS                                                                                                         | 0.3076923 | 0.02213 | 0.2307692 | 0.14694 | 0.3076923 | 0.03737  |
| Cell-cell junction organization                                                                                                      | 0.171875  | 0.02233 | 0.140625  | 0.21991 | 0.09375   | 0.65628  |
| Transcriptional activation of mitochondrial biogenesis                                                                               | 0.1785714 | 0.02242 | 0.1607143 | 0.12446 | 0.3035714 | 2.86E-05 |
| Other interleukin signaling                                                                                                          | 0.2307692 | 0.02248 | 0.2692308 | 0.01467 | 0.3076923 | 0.00352  |
| Signaling by VEGF                                                                                                                    | 0.1495327 | 0.02389 | 0.1962617 | 0.00313 | 0.1121495 | 0.42185  |
| Degradation of beta-catenin by the destruction complex                                                                               | 0.1585366 | 0.02563 | 0.0853659 | 0.76532 | 0.097561  | 0.61732  |
| Signaling by NOTCH4                                                                                                                  | 0.1585366 | 0.02563 | 0.1219512 | 0.35037 | 0.0853659 | 0.75251  |
| Negative regulation of FGFR2 signaling                                                                                               | 0.2058824 | 0.02581 | 0.0882353 | 0.70359 | 0.2647059 | 0.00611  |
| Signaling by Hippo                                                                                                                   | 0.25      | 0.0262  | 0.2       | 0.14869 | 0.15      | 0.33962  |
| TP53 Regulates Transcription of Genes Involved in Cytochrome C Release                                                               | 0.25      | 0.0262  | 0.35      | 0.00301 | 0.3       | 0.01279  |
| Listeria monocytogenes entry into host cells                                                                                         | 0.25      | 0.0262  | 0.05      | 0.88981 | 0.15      | 0.33962  |
| Deactivation of the beta-catenin transactivating complex                                                                             | 0.1904762 | 0.02751 | 0.1904762 | 0.06568 | 0.1428571 | 0.2602   |
| Beta-catenin independent WNT signaling                                                                                               | 0.137931  | 0.02812 | 0.1103448 | 0.44551 | 0.1241379 | 0.23337  |
| Deubiquitination                                                                                                                     | 0.1212121 | 0.02878 | 0.1144781 | 0.30754 | 0.1414141 | 0.02031  |
| SEMA3A-Plexin repulsion signaling by inhibiting Integrin adhesion                                                                    | 0.2857143 | 0.02888 | 0.2142857 | 0.1733  | 0.3571429 | 0.01035  |
| TP53 regulates transcription of several additional cell death genes whose specific roles in p53-dependent apoptosis remain uncertain | 0.2857143 | 0.02888 | 0.2142857 | 0.1733  | 0.2142857 | 0.1683   |



|                                                                                                                  |           |         |           |         |           |          |
|------------------------------------------------------------------------------------------------------------------|-----------|---------|-----------|---------|-----------|----------|
| Interleukin-15 signaling                                                                                         | 0.2857143 | 0.02888 | 0.2857143 | 0.05029 | 0.3571429 | 0.01035  |
| EPH-Ephrin signaling                                                                                             | 0.1521739 | 0.02903 | 0.2282609 | 0.00041 | 0.1086957 | 0.47733  |
| The role of GTSE1 in G2/M progression after G2 checkpoint                                                        | 0.16      | 0.02931 | 0.0933333 | 0.67836 | 0.0666667 | 0.89673  |
| NIK-->noncanonical NF-kB signaling                                                                               | 0.1694915 | 0.03123 | 0.0847458 | 0.75093 | 0.0847458 | 0.73976  |
| Signaling by SCF-KIT                                                                                             | 0.1860465 | 0.0313  | 0.1627907 | 0.15573 | 0.3255814 | 6.12E-05 |
| Sphingolipid de novo biosynthesis                                                                                | 0.1860465 | 0.0313  | 0.1627907 | 0.15573 | 0.2093023 | 0.02844  |
| EPH-ephrin mediated repulsion of cells                                                                           | 0.1764706 | 0.03161 | 0.254902  | 0.00175 | 0.1372549 | 0.26799  |
| CD209 (DC-SIGN) signaling                                                                                        | 0.2380952 | 0.03198 | 0.2380952 | 0.0605  | 0.3809524 | 0.00073  |
| TP53 regulates transcription of additional cell cycle genes whose exact role in the p53 pathway remain uncertain | 0.2380952 | 0.03198 | 0.2380952 | 0.0605  | 0.2857143 | 0.01638  |
| Interleukin-37 signaling                                                                                         | 0.2380952 | 0.03198 | 0.2380952 | 0.0605  | 0.2857143 | 0.01638  |
| G2/M Transition                                                                                                  | 0.128866  | 0.03277 | 0.1082474 | 0.46328 | 0.0721649 | 0.9444   |
| RHO GTPases Activate WASPs and WAVEs                                                                             | 0.1944444 | 0.03441 | 0.1111111 | 0.52624 | 0.0555556 | 0.89752  |
| Cellular Senescence                                                                                              | 0.1282051 | 0.03458 | 0.1076923 | 0.47314 | 0.1076923 | 0.44692  |
| Interleukin-2 family signaling                                                                                   | 0.1818182 | 0.03542 | 0.1590909 | 0.16964 | 0.2272727 | 0.01224  |
| TP53 Regulates Metabolic Genes                                                                                   | 0.1511628 | 0.03627 | 0.1744186 | 0.03152 | 0.0930233 | 0.6713   |
| Mitotic G2-G2/M phases                                                                                           | 0.127551  | 0.03648 | 0.1071429 | 0.48299 | 0.0714286 | 0.94934  |
| Activation of BAD and translocation to mitochondria                                                              | 0.2666667 | 0.03671 | 0.2666667 | 0.06311 | 0.1333333 | 0.46644  |
| YAP1- and WWTR1 (TAZ)-stimulated gene expression                                                                 | 0.2666667 | 0.03671 | 0.2       | 0.20085 | 0.2666667 | 0.06052  |
| phosphorylation site mutants of CTNNB1 are not targeted to the proteasome by the destruction complex             | 0.2666667 | 0.03671 | NA        | NA      | 0.0666667 | 0.80406  |
| Misspliced GSK3beta mutants stabilize beta-catenin                                                               | 0.2666667 | 0.03671 | NA        | NA      | 0.0666667 | 0.80406  |
| S33 mutants of beta-catenin aren't phosphorylated                                                                | 0.2666667 | 0.03671 | NA        | NA      | 0.0666667 | 0.80406  |
| S37 mutants of beta-catenin aren't phosphorylated                                                                | 0.2666667 | 0.03671 | NA        | NA      | 0.0666667 | 0.80406  |
| S45 mutants of beta-catenin aren't phosphorylated                                                                | 0.2666667 | 0.03671 | NA        | NA      | 0.0666667 | 0.80406  |
| T41 mutants of beta-catenin aren't phosphorylated                                                                | 0.2666667 | 0.03671 | NA        | NA      | 0.0666667 | 0.80406  |
| The NLRP3 inflammasome                                                                                           | 0.2666667 | 0.03671 | 0.2666667 | 0.06311 | 0.3333333 | 0.01423  |
| InlB-mediated entry of Listeria monocytogenes into host cell                                                     | 0.2666667 | 0.03671 | 0.0666667 | 0.80867 | 0.0666667 | 0.80406  |
| N-Glycan antennae elongation                                                                                     | 0.2666667 | 0.03671 | 0.2       | 0.20085 | 0.2666667 | 0.06052  |
| Signaling by NOTCH                                                                                               | 0.1234043 | 0.03777 | 0.1361702 | 0.0697  | 0.1191489 | 0.2315   |
| Signaling by RAS mutants                                                                                         | 0.1698113 | 0.03942 | 0.0943396 | 0.66064 | 0.1320755 | 0.3015   |
| Gap junction trafficking                                                                                         | 0.1777778 | 0.0399  | 0.2888889 | 0.00049 | 0.0666667 | 0.85574  |
| Synthesis of active ubiquitin: roles of E1 and E2 enzymes                                                        | 0.2       | 0.04304 | 0.2       | 0.08579 | 0.1333333 | 0.37311  |
| Molecules associated with elastic fibres                                                                         | 0.1842105 | 0.04472 | 0.2105263 | 0.03926 | 0.1052632 | 0.559    |

|                                                                                    |           |         |           |          |           |         |
|------------------------------------------------------------------------------------|-----------|---------|-----------|----------|-----------|---------|
| Microtubule-dependent trafficking of connexons from Golgi to the plasma membrane   | 0.25      | 0.04566 | 0.375     | 0.00405  | 0.0625    | 0.82425 |
| Glycogen synthesis                                                                 | 0.25      | 0.04566 | NA        | NA       | 0.125     | 0.5012  |
| Rap1 signalling                                                                    | 0.25      | 0.04566 | 0.1875    | 0.22932  | 0.1875    | 0.22313 |
| Ub-specific processing proteases                                                   | 0.1227273 | 0.04643 | 0.0954545 | 0.70055  | 0.1045455 | 0.50092 |
| Transcriptional Regulation by MECP2                                                | 0.1636364 | 0.04844 | 0.1636364 | 0.11443  | 0.2181818 | 0.00891 |
| Signaling by NTRKs                                                                 | 0.1414141 | 0.04986 | 0.2222222 | 0.00045  | 0.1717172 | 0.02355 |
| COPI-mediated anterograde transport                                                | 0.1414141 | 0.04986 | 0.1212121 | 0.33602  | 0.0505051 | 0.97974 |
| PI5P, PP2A and IER3 Regulate PI3K/AKT Signaling                                    | 0.1414141 | 0.04986 | 0.1313131 | 0.23003  | 0.1818182 | 0.01156 |
| NOTCH1 Intracellular Domain Regulates Transcription                                | 0.1702128 | 0.04994 | 0.212766  | 0.02104  | 0.212766  | 0.01928 |
| RUNX1 interacts with co-factors whose precise effect on RUNX1 targets is not known | 0.1315789 | 0.2375  | 0.3421053 | 7.21E-05 | 0.3157895 | 0.00028 |
| SUMOylation                                                                        | 0.1229947 | 0.06108 | 0.1925134 | 0.0002   | 0.1604278 | 0.0091  |
| SUMO E3 ligases SUMOylate target proteins                                          | 0.121547  | 0.07294 | 0.1933702 | 0.00022  | 0.1657459 | 0.00572 |
| Axon guidance                                                                      | 0.0998185 | 0.16996 | 0.1488203 | 0.00051  | 0.0889292 | 0.88266 |
| Extracellular matrix organization                                                  | 0.1162791 | 0.05142 | 0.166113  | 0.00057  | 0.1196013 | 0.19008 |
| Gap junction assembly                                                              | 0.1764706 | 0.0726  | 0.2941176 | 0.00185  | 0.0588235 | 0.87829 |
| p75NTR regulates axonogenesis                                                      | 0.1       | 0.60096 | 0.5       | 0.00197  | 0.2       | 0.27514 |
| L1CAM interactions                                                                 | 0.1025641 | 0.32913 | 0.1965812 | 0.002    | 0.1111111 | 0.42862 |
| SUMOylation of RNA binding proteins                                                | 0.1304348 | 0.2129  | 0.2608696 | 0.00211  | 0.0869565 | 0.71074 |
| NRAGE signals death through JNK                                                    | 0.1186441 | 0.25772 | 0.2372881 | 0.00247  | 0.1016949 | 0.57541 |
| Netrin-1 signaling                                                                 | 0.12      | 0.27262 | 0.24      | 0.00445  | 0.12      | 0.41073 |
| Repression of WNT target genes                                                     | 0.1666667 | 0.28434 | 0.4166667 | 0.00518  | 0.3333333 | 0.0281  |
| Semaphorin interactions                                                            | 0.1076923 | 0.34358 | 0.2153846 | 0.00628  | 0.1384615 | 0.22158 |
| EPHB-mediated forward signaling                                                    | 0.1666667 | 0.07079 | 0.2380952 | 0.00962  | 0.0952381 | 0.64007 |
| Laminin interactions                                                               | 0.1333333 | 0.26692 | 0.2666667 | 0.00988  | 0.1       | 0.6092  |
| EPHA-mediated growth cone collapse                                                 | 0.1       | 0.49705 | 0.2666667 | 0.00988  | 0.2       | 0.08142 |
| Ephrin signaling                                                                   | 0.2105263 | 0.079   | 0.3157895 | 0.01045  | 0.2105263 | 0.12425 |
| Sema4D in semaphorin signaling                                                     | 0.16      | 0.17156 | 0.28      | 0.01175  | 0.2       | 0.10735 |
| NOTCH4 Intracellular Domain Regulates Transcription                                | 0.05      | 0.84092 | 0.3       | 0.01364  | 0.25      | 0.04779 |
| Activation of the AP-1 family of transcription factors                             | 0.2       | 0.21682 | 0.4       | 0.01477  | 0.2       | 0.27514 |
| Recycling pathway of L1                                                            | 0.1111111 | 0.36038 | 0.2222222 | 0.01567  | 0.1333333 | 0.31557 |
| Sema4D induced cell migration and growth-cone collapse                             | 0.1428571 | 0.27853 | 0.2857143 | 0.01745  | 0.1904762 | 0.16354 |
| Phospholipase C-mediated cascade: FGFR1                                            | 0.125     | 0.41592 | 0.3125    | 0.02006  | 0.1875    | 0.22313 |

|                                                                     |           |         |           |         |           |         |
|---------------------------------------------------------------------|-----------|---------|-----------|---------|-----------|---------|
| Formation of annular gap junctions                                  | 0.2727273 | 0.06517 | 0.3636364 | 0.02133 | 0.0909091 | 0.69731 |
| Erythropoietin activates Phosphoinositide-3-kinase (PI3K)           | 0.2727273 | 0.06517 | 0.3636364 | 0.02133 | 0.2727273 | 0.09574 |
| Regulation of HSF1-mediated heat shock response                     | 0.1029412 | 0.38784 | 0.1911765 | 0.022   | 0.0735294 | 0.84224 |
| SUMOylation of DNA damage response and repair proteins              | 0.0921053 | 0.50488 | 0.1842105 | 0.02417 | 0.1052632 | 0.52846 |
| Regulation of RUNX1 Expression and Activity                         | 0.2352941 | 0.0557  | 0.2941176 | 0.02603 | 0.4117647 | 0.00092 |
| Formation of tubulin folding intermediates by CCT/TriC              | 0.1304348 | 0.32822 | 0.2608696 | 0.02712 | 0.0434783 | 0.91794 |
| Transcriptional regulation of pluripotent stem cells                | 0.1111111 | 0.3898  | 0.2222222 | 0.02922 | 0.2222222 | 0.02717 |
| Gap junction degradation                                            | 0.25      | 0.08142 | 0.3333333 | 0.02941 | 0.0833333 | 0.72849 |
| Cooperation of Prefoldin and TriC/CCT in actin and tubulin folding  | 0.1       | 0.49705 | 0.2333333 | 0.03149 | 0.0333333 | 0.9617  |
| G alpha (12/13) signalling events                                   | 0.1012658 | 0.39039 | 0.1772152 | 0.03272 | 0.0632911 | 0.91988 |
| Pre-NOTCH Processing in Golgi                                       | 0.0555556 | 0.80878 | 0.2777778 | 0.03303 | 0.2222222 | 0.10631 |
| PI3K Cascade                                                        | 0.0681818 | 0.75466 | 0.2045455 | 0.03522 | 0.2045455 | 0.03261 |
| SUMOylation of DNA replication proteins                             | 0.0681818 | 0.75466 | 0.2045455 | 0.03522 | 0.0681818 | 0.84496 |
| Cellular response to heat stress                                    | 0.0909091 | 0.51265 | 0.1704545 | 0.0378  | 0.0909091 | 0.69648 |
| IRF3-mediated induction of type I IFN                               | 0.1538462 | 0.318   | 0.3076923 | 0.03906 | NA        | NA      |
| CLEC7A (Dectin-1) induces NFAT activation                           | 0.2307692 | 0.0992  | 0.3076923 | 0.03906 | 0.2307692 | 0.14256 |
| Non-integrin membrane-ECM interactions                              | 0.1525424 | 0.07033 | 0.1864407 | 0.03951 | 0.2033898 | 0.01553 |
| IRS-related events triggered by IGF1R                               | 0.0961538 | 0.48479 | 0.1923077 | 0.04009 | 0.1923077 | 0.03698 |
| Regulation of TP53 Activity through Methylation                     | 0.2105263 | 0.079   | 0.2631579 | 0.0411  | 0.2105263 | 0.12425 |
| Export of Viral Ribonucleoproteins from Nucleus                     | 0.125     | 0.30749 | 0.21875   | 0.04342 | 0.09375   | 0.65366 |
| Vpr-mediated nuclear import of PICs                                 | 0.09375   | 0.54148 | 0.21875   | 0.04342 | 0.09375   | 0.65366 |
| RUNX2 regulates bone development                                    | 0.09375   | 0.54148 | 0.21875   | 0.04342 | 0.21875   | 0.04074 |
| Antigen processing: Ubiquitination & Proteasome degradation         | 0.0906149 | 0.45796 | 0.1359223 | 0.0438  | 0.1100324 | 0.36508 |
| IGF1R signaling cascade                                             | 0.0943396 | 0.50198 | 0.1886792 | 0.04498 | 0.1886792 | 0.04154 |
| Prefoldin mediated transfer of substrate to CCT/TriC                | 0.1153846 | 0.40239 | 0.2307692 | 0.04734 | 0.0384615 | 0.9408  |
| Class I MHC mediated antigen processing & presentation              | 0.1105121 | 0.07213 | 0.1320755 | 0.04853 | 0.1105121 | 0.33647 |
| RORA activates gene expression                                      | 0.1111111 | 0.47715 | 0.1111111 | 0.574   | 0.4444444 | 0.00021 |
| Chromatin modifying enzymes                                         | 0.0581818 | 0.97437 | 0.12      | 0.21987 | 0.1709091 | 0.00032 |
| Chromatin organization                                              | 0.0581818 | 0.97437 | 0.12      | 0.21987 | 0.1709091 | 0.00032 |
| Transport of inorganic cations/anions and amino acids/oligopeptides | 0.1203704 | 0.15052 | 0.1111111 | 0.45431 | 0.212963  | 0.00053 |
| Xenobiotics                                                         | 0.125     | 0.35309 | 0.125     | 0.46433 | 0.3333333 | 0.002   |
| Regulation of gene expression by Hypoxia-inducible Factor           | 0.1818182 | 0.25052 | 0.0909091 | 0.70255 | 0.4545455 | 0.00311 |

|                                                                 |           |         |           |         |           |         |
|-----------------------------------------------------------------|-----------|---------|-----------|---------|-----------|---------|
| Regulation of KIT signaling                                     | 0.125     | 0.41592 | 0.125     | 0.50885 | 0.375     | 0.00378 |
| BMAL1:CLOCK,NPAS2 activates circadian gene expression           | 0.1851852 | 0.0824  | 0.1481481 | 0.30913 | 0.2962963 | 0.00456 |
| Loss of function of MECP2 in Rett syndrome                      | 0.1538462 | 0.318   | 0.0769231 | 0.76143 | 0.3846154 | 0.00726 |
| Pervasive developmental disorders                               | 0.1538462 | 0.318   | 0.0769231 | 0.76143 | 0.3846154 | 0.00726 |
| Activation of gene expression by SREBF (SREBP)                  | 0.0952381 | 0.50957 | 0.0714286 | 0.82867 | 0.2380952 | 0.00876 |
| Regulation of cholesterol biosynthesis by SREBP (SREBF)         | 0.1090909 | 0.35179 | 0.0909091 | 0.69291 | 0.2181818 | 0.00891 |
| FRS-mediated FGFR2 signaling                                    | 0.08      | 0.65755 | 0.12      | 0.49212 | 0.28      | 0.01093 |
| FGFR1 mutant receptor activation                                | 0.1612903 | 0.13067 | 0.1612903 | 0.21723 | 0.2580645 | 0.0112  |
| Chondroitin sulfate/dermatan sulfate metabolism                 | 0.08      | 0.65002 | 0.1       | 0.60831 | 0.22      | 0.01129 |
| Signaling by Insulin receptor                                   | 0.0512821 | 0.9202  | 0.1282051 | 0.29375 | 0.1923077 | 0.01227 |
| PKMTs methylate histone lysines                                 | 0.056338  | 0.88047 | 0.084507  | 0.76402 | 0.1971831 | 0.01231 |
| Transcriptional regulation by RUNX1                             | 0.1129707 | 0.10325 | 0.1171548 | 0.28494 | 0.1506276 | 0.01231 |
| Defective B4GALT7 causes EDS, progeroid type                    | 0.1       | 0.5343  | 0.05      | 0.88981 | 0.3       | 0.01279 |
| Defective B3GAT3 causes JDSSDHD                                 | 0.05      | 0.84092 | 0.05      | 0.88981 | 0.3       | 0.01279 |
| Defective B3GALT6 causes EDSP2 and SEMDJL1                      | 0.05      | 0.84092 | 0.05      | 0.88981 | 0.3       | 0.01279 |
| FRS-mediated FGFR3 signaling                                    | 0.1       | 0.5343  | 0.05      | 0.88981 | 0.3       | 0.01279 |
| Signaling by FGFR1 in disease                                   | 0.1578947 | 0.11132 | 0.1578947 | 0.19974 | 0.2368421 | 0.01306 |
| A tetrasaccharide linker sequence is required for GAG synthesis | 0.1153846 | 0.40239 | 0.0384615 | 0.94319 | 0.2692308 | 0.01366 |
| Bicarbonate transporters                                        | 0.1       | 0.60096 | 0.1       | 0.66787 | 0.4       | 0.01409 |
| Mitochondrial biogenesis                                        | 0.1157895 | 0.20945 | 0.1157895 | 0.40488 | 0.1789474 | 0.01613 |
| Insulin receptor signalling cascade                             | 0.0740741 | 0.70931 | 0.1666667 | 0.10485 | 0.2037037 | 0.01983 |
| CYP2E1 reactions                                                | NA        | NA      | 0.0909091 | 0.70255 | 0.3636364 | 0.02036 |
| HS-GAG degradation                                              | 0.0454545 | 0.86766 | 0.0454545 | 0.91164 | 0.2727273 | 0.02061 |
| FRS-mediated FGFR4 signaling                                    | 0.1363636 | 0.30333 | 0.0909091 | 0.68473 | 0.2727273 | 0.02061 |
| IRS-mediated signalling                                         | 0.0833333 | 0.61752 | 0.1875    | 0.05744 | 0.2083333 | 0.02218 |
| Negative regulation of the PI3K/AKT network                     | 0.1320755 | 0.07928 | 0.1226415 | 0.31108 | 0.1698113 | 0.02243 |
| Phase I - Functionalization of compounds                        | 0.0841121 | 0.60319 | 0.0747664 | 0.88186 | 0.1682243 | 0.02447 |
| FRS-mediated FGFR1 signaling                                    | 0.1304348 | 0.32822 | 0.173913  | 0.21362 | 0.2608696 | 0.02553 |
| Constitutive Signaling by Aberrant PI3K in Cancer               | 0.1267606 | 0.16741 | 0.1549296 | 0.1171  | 0.1830986 | 0.02764 |
| SUMOylation of intracellular receptors                          | 0.1333333 | 0.26692 | 0.2       | 0.08579 | 0.2333333 | 0.02948 |
| Downstream signaling of activated FGFR2                         | 0.0666667 | 0.75326 | 0.1666667 | 0.19791 | 0.2333333 | 0.02948 |
| Regulation of TP53 Activity through Acetylation                 | 0.1666667 | 0.11759 | 0.2       | 0.08579 | 0.2333333 | 0.02948 |
| SLC-mediated transmembrane transport                            | 0.0934959 | 0.40617 | 0.0813008 | 0.90704 | 0.1422764 | 0.02956 |

|                                                                   |           |         |           |         |           |         |
|-------------------------------------------------------------------|-----------|---------|-----------|---------|-----------|---------|
| ABC transporters in lipid homeostasis                             | 0.2222222 | 0.06682 | 0.1111111 | 0.574   | 0.2777778 | 0.03134 |
| Signaling by cytosolic FGFR1 fusion mutants                       | 0.1666667 | 0.20588 | 0.1666667 | 0.28807 | 0.2777778 | 0.03134 |
| Gastrin-CREB signalling pathway via PKC and MAPK                  | 0.2222222 | 0.06682 | 0.1666667 | 0.28807 | 0.2777778 | 0.03134 |
| Signaling by FGFR2                                                | 0.1232877 | 0.18783 | 0.1232877 | 0.35053 | 0.1780822 | 0.03394 |
| Cytochrome P450 - arranged by substrate type                      | 0.0606061 | 0.84245 | 0.1212121 | 0.38295 | 0.1818182 | 0.0352  |
| FGFR2c ligand binding and activation                              | 0.0769231 | 0.69714 | 0.1538462 | 0.39976 | 0.3076923 | 0.03737 |
| Notch-HLH transcription pathway                                   | NA        | NA      | 0.2307692 | 0.14694 | 0.3076923 | 0.03737 |
| TNFR1-induced proapoptotic signaling                              | 0.2307692 | 0.0992  | 0.2307692 | 0.14694 | 0.3076923 | 0.03737 |
| Downstream signaling of activated FGFR3                           | 0.08      | 0.65755 | 0.12      | 0.49212 | 0.24      | 0.03755 |
| NOTCH3 Intracellular Domain Regulates Transcription               | 0.04      | 0.89959 | 0.2       | 0.11223 | 0.24      | 0.03755 |
| Transport of small molecules                                      | 0.0871369 | 0.54436 | 0.0816044 | 0.98577 | 0.1230982 | 0.03922 |
| Ion channel transport                                             | 0.0806452 | 0.67299 | 0.0967742 | 0.66852 | 0.1451613 | 0.04135 |
| Signaling by Type 1 Insulin-like Growth Factor 1 Receptor (IGF1R) | 0.0925926 | 0.51895 | 0.1851852 | 0.05026 | 0.1851852 | 0.04647 |
| RHO GTPases activate CIT                                          | 0.1       | 0.5343  | 0.2       | 0.14869 | 0.25      | 0.04779 |
| Inflammasomes                                                     | 0.2       | 0.09221 | 0.25      | 0.05025 | 0.25      | 0.04779 |
| Defective EXT2 causes exostoses 2                                 | 0.0714286 | 0.72375 | 0.0714286 | 0.78635 | 0.2857143 | 0.04818 |
| Defective EXT1 causes exostoses 1, TRPS2 and CHDS                 | 0.0714286 | 0.72375 | 0.0714286 | 0.78635 | 0.2857143 | 0.04818 |
| Activation of RAC1                                                | 0.2142857 | 0.11838 | 0.2857143 | 0.05029 | 0.2857143 | 0.04818 |
| Regulation of TP53 Activity through Association with Co-factors   | 0.1428571 | 0.35127 | 0.2142857 | 0.1733  | 0.2857143 | 0.04818 |
| Tryptophan catabolism                                             | 0.0714286 | 0.72375 | 0.2142857 | 0.1733  | 0.2857143 | 0.04818 |
| RUNX3 regulates NOTCH signaling                                   | 0.0714286 | 0.72375 | 0.2142857 | 0.1733  | 0.2857143 | 0.04818 |
