# Supplementary material for: Comparative transcriptional profiling of the early host response to infection by typhoidal and non-typhoidal Salmonella serovars in human intestinal organoids
Source: PubMed Central journal article supplement (PMC8570492; doi:10.1371/journal.ppat.1009987), 2021-10-20
Supplement: ppat.1009987.s014.pdf [file ppat.1009987.s014.pdf]

**Table S6: Reactome Pathways Downregulated 8h pi**

| Description                                                                  | STM        |          | SE         |         | ST         |          |
|------------------------------------------------------------------------------|------------|----------|------------|---------|------------|----------|
|                                                                              | gene ratio | p-value  | gene ratio | p-value | gene ratio | p-value  |
| Translation                                                                  | 0.4261168  | 2.59E-39 | 0.0137457  | 1       | 0.089347   | 0.00439  |
| Metabolism of RNA                                                            | 0.268546   | 4.24E-26 | 0.05192878 | 0.99764 | 0.086053   | 7.03E-05 |
| Influenza Viral RNA Transcription and Replication                            | 0.4962406  | 5.92E-26 | 0.01503759 | 0.99977 | 0.142857   | 4.89E-05 |
| Eukaryotic Translation Termination                                           | 0.5806452  | 7.68E-26 | 0.01075269 | 0.9995  | 0.129032   | 0.00285  |
| Influenza Life Cycle                                                         | 0.4755245  | 2.58E-25 | 0.02097902 | 0.99927 | 0.13986    | 4.25E-05 |
| Selenoamino acid metabolism                                                  | 0.5169492  | 2.61E-25 | 0.00847458 | 0.99994 | 0.118644   | 0.00294  |
| Eukaryotic Translation Elongation                                            | 0.5698925  | 7.64E-25 | 0.01075269 | 0.9995  | 0.139785   | 0.00092  |
| rRNA processing in the nucleus and cytosol                                   | 0.4102564  | 2.72E-24 | 0.03076923 | 0.99835 | 0.092308   | 0.01187  |
| SRP-dependent cotranslational protein targeting to membrane                  | 0.5178571  | 3.57E-24 | 0.00892857 | 0.99989 | 0.133929   | 0.00061  |
| Peptide chain elongation                                                     | 0.5730337  | 4.19E-24 | 0.01123596 | 0.9993  | 0.146067   | 0.0006   |
| Viral mRNA Translation                                                       | 0.5730337  | 4.19E-24 | 0.01123596 | 0.9993  | 0.134831   | 0.00196  |
| Selenocysteine synthesis                                                     | 0.5591398  | 7.28E-24 | 0.01075269 | 0.9995  | 0.139785   | 0.00092  |
| Major pathway of rRNA processing in the nucleolus and cytosol                | 0.4108108  | 3.57E-23 | 0.03243243 | 0.99705 | 0.091892   | 0.01483  |
| Influenza Infection                                                          | 0.4415584  | 5.39E-23 | 0.01948052 | 0.99966 | 0.12987    | 0.00012  |
| rRNA processing                                                              | 0.3902439  | 1.28E-22 | 0.02926829 | 0.99908 | 0.087805   | 0.01898  |
| Cell Cycle                                                                   | 0.2605304  | 1.62E-22 | 0.07332293 | 0.70025 | 0.134165   | 6.29E-17 |
| Nonsense Mediated Decay (NMD) independent of the Exon Junction Complex (EJC) | 0.5368421  | 2.44E-22 | 0.02105263 | 0.9961  | 0.126316   | 0.00341  |
| Formation of a pool of free 40S subunits                                     | 0.5148515  | 1.20E-21 | 0.00990099 | 0.99974 | 0.118812   | 0.00563  |
| L13a-mediated translational silencing of Ceruloplasmin expression            | 0.4864865  | 6.21E-21 | 0.00900901 | 0.99989 | 0.117117   | 0.00457  |
| GTP hydrolysis and joining of the 60S ribosomal subunit                      | 0.4821429  | 1.06E-20 | 0.00892857 | 0.99989 | 0.116071   | 0.00494  |
| Nonsense-Mediated Decay (NMD)                                                | 0.4608696  | 3.20E-19 | 0.03478261 | 0.98235 | 0.121739   | 0.00231  |
| Nonsense Mediated Decay (NMD) enhanced by the Exon Junction Complex (EJC)    | 0.4608696  | 3.20E-19 | 0.03478261 | 0.98235 | 0.121739   | 0.00231  |
| Eukaryotic Translation Initiation                                            | 0.4537815  | 3.55E-19 | 0.00840336 | 0.99994 | 0.109244   | 0.00819  |
| Cap-dependent Translation Initiation                                         | 0.4537815  | 3.55E-19 | 0.00840336 | 0.99994 | 0.109244   | 0.00819  |
| Cell Cycle, Mitotic                                                          | 0.255597   | 9.29E-18 | 0.06343284 | 0.91941 | 0.13806    | 2.69E-15 |
| Cell Cycle Checkpoints                                                       | 0.3105802  | 9.72E-18 | 0.07167235 | 0.6925  | 0.156997   | 8.51E-12 |
| Metabolism of amino acids and derivatives                                    | 0.2864865  | 1.22E-17 | 0.06216216 | 0.89941 | 0.089189   | 0.00146  |
| S Phase                                                                      | 0.3664596  | 1.66E-15 | 0.08074534 | 0.49199 | 0.217391   | 2.05E-13 |
| Activation of the pre-replicative complex                                    | 0.7272727  | 1.80E-15 | 0.12121212 | 0.25476 | 0.424242   | 2.62E-10 |
| Activation of ATR in response to replication stress                          | 0.6756757  | 7.25E-15 | 0.10810811 | 0.32663 | 0.486486   | 3.55E-14 |

|                                                                             |           |          |            |         |          |          |
|-----------------------------------------------------------------------------|-----------|----------|------------|---------|----------|----------|
| DNA Repair                                                                  | 0.2816456 | 1.73E-14 | 0.09177215 | 0.20472 | 0.129747 | 3.87E-08 |
| G1/S Transition                                                             | 0.3816794 | 3.80E-14 | 0.07633588 | 0.57727 | 0.221374 | 1.54E-11 |
| DNA strand elongation                                                       | 0.6875    | 1.79E-13 | 0.125      | 0.2373  | 0.5      | 5.58E-13 |
| DNA Replication                                                             | 0.3779528 | 1.91E-13 | 0.07086614 | 0.66787 | 0.23622  | 1.14E-12 |
| Regulation of expression of SLITs and ROBOs                                 | 0.3333333 | 5.45E-13 | 0.02339181 | 0.99947 | 0.099415 | 0.00706  |
| Mitotic G1-G1/S phases                                                      | 0.3489933 | 7.54E-13 | 0.08053691 | 0.49937 | 0.208054 | 1.69E-11 |
| Synthesis of DNA                                                            | 0.3697479 | 4.69E-12 | 0.05882353 | 0.83088 | 0.226891 | 4.29E-11 |
| G2/M Checkpoints                                                            | 0.3214286 | 1.13E-11 | 0.06547619 | 0.77085 | 0.172619 | 7.63E-09 |
| Chromosome Maintenance                                                      | 0.3636364 | 8.01E-11 | 0.06363636 | 0.7654  | 0.172727 | 2.97E-06 |
| Homology Directed Repair                                                    | 0.3333333 | 9.67E-11 | 0.10144928 | 0.18871 | 0.115942 | 0.00194  |
| HDR through Homologous Recombination (HRR) or Single Strand Annealing (SSA) | 0.3333333 | 2.47E-10 | 0.10606061 | 0.14864 | 0.121212 | 0.00122  |
| HDR through Homologous Recombination (HRR)                                  | 0.4328358 | 2.64E-10 | 0.17910448 | 0.00521 | 0.208955 | 6.16E-06 |
| Mitochondrial translation                                                   | 0.3763441 | 4.11E-10 | NA         | NA      | 0.064516 | 0.34667  |
| Infectious disease                                                          | 0.2356021 | 5.79E-10 | 0.02879581 | 0.99999 | 0.089005 | 0.00129  |
| Extension of Telomeres                                                      | 0.6       | 8.48E-10 | 0.13333333 | 0.20332 | 0.366667 | 1.38E-07 |
| Signaling by ROBO receptors                                                 | 0.2752294 | 9.67E-10 | 0.02752294 | 0.99958 | 0.082569 | 0.03266  |
| The citric acid (TCA) cycle and respiratory electron transport              | 0.2931034 | 1.68E-09 | 0.02873563 | 0.99828 | 0.051724 | 0.54466  |
| DNA Double-Strand Break Repair                                              | 0.2951807 | 2.71E-09 | 0.08433735 | 0.42225 | 0.10241  | 0.00526  |
| Homologous DNA Pairing and Strand Exchange                                  | 0.5       | 3.15E-09 | 0.19047619 | 0.01458 | 0.261905 | 6.13E-06 |
| Presynaptic phase of homologous DNA pairing and strand exchange             | 0.5128205 | 4.24E-09 | 0.20512821 | 0.00934 | 0.25641  | 2.00E-05 |
| Mitochondrial translation elongation                                        | 0.3678161 | 4.49E-09 | NA         | NA      | 0.068966 | 0.29159  |
| Mitochondrial translation termination                                       | 0.3678161 | 4.49E-09 | NA         | NA      | 0.068966 | 0.29159  |
| DNA Replication Pre-Initiation                                              | 0.3647059 | 9.90E-09 | 0.07058824 | 0.66078 | 0.211765 | 2.38E-07 |
| HDR through Single Strand Annealing (SSA)                                   | 0.5135135 | 1.01E-08 | 0.21621622 | 0.00673 | 0.216216 | 0.00048  |
| Telomere C-strand (Lagging Strand) Synthesis                                | 0.625     | 1.02E-08 | 0.16666667 | 0.11269 | 0.375    | 1.57E-06 |
| Processing of Capped Intron-Containing Pre-mRNA                             | 0.255144  | 1.27E-08 | 0.03703704 | 0.99726 | 0.106996 | 0.00032  |
| Respiratory electron transport                                              | 0.34      | 1.53E-08 | NA         | NA      | 0.07     | 0.25663  |
| Mitochondrial translation initiation                                        | 0.3563218 | 1.88E-08 | NA         | NA      | 0.068966 | 0.29159  |
| Activation of E2F1 target genes at G1/S                                     | 0.5714286 | 2.00E-08 | 0.14285714 | 0.17096 | 0.357143 | 6.89E-07 |
| G1/S-Specific Transcription                                                 | 0.5714286 | 2.00E-08 | 0.14285714 | 0.17096 | 0.357143 | 6.89E-07 |
| tRNA Aminoacylation                                                         | 0.4761905 | 2.18E-08 | 0.07142857 | 0.64741 | 0.071429 | 0.36904  |
| Processing of DNA double-strand break ends                                  | 0.3367347 | 3.26E-08 | 0.09183673 | 0.35654 | 0.112245 | 0.01188  |

|                                                                                                                     |           |          |            |         |          |          |
|---------------------------------------------------------------------------------------------------------------------|-----------|----------|------------|---------|----------|----------|
| Formation of the ternary complex, and subsequently, the 43S complex                                                 | 0.4313725 | 4.13E-08 | 0.01960784 | 0.98433 | 0.137255 | 0.01501  |
| Unwinding of DNA                                                                                                    | 0.8333333 | 4.32E-08 | 0.08333333 | 0.62319 | 0.666667 | 1.95E-08 |
| Telomere Maintenance                                                                                                | 0.3536585 | 6.50E-08 | 0.04878049 | 0.89197 | 0.170732 | 6.78E-05 |
| Mitotic Spindle Checkpoint                                                                                          | 0.3125    | 1.06E-07 | 0.08035714 | 0.51482 | 0.151786 | 5.57E-05 |
| Translation initiation complex formation                                                                            | 0.3965517 | 1.35E-07 | 0.01724138 | 0.99116 | 0.12069  | 0.0287   |
| Ribosomal scanning and start codon recognition                                                                      | 0.3965517 | 1.35E-07 | 0.01724138 | 0.99116 | 0.12069  | 0.0287   |
| G2/M DNA damage checkpoint                                                                                          | 0.3263158 | 1.90E-07 | 0.09473684 | 0.32288 | 0.157895 | 9.55E-05 |
| Activation of the mRNA upon binding of the cap-binding complex and eIFs, and subsequent binding to 43S              | 0.3898305 | 1.95E-07 | 0.01694915 | 0.99185 | 0.118644 | 0.03117  |
| CDC6 association with the ORC:origin complex                                                                        | 0.8181818 | 2.93E-07 | 0.27272727 | 0.04873 | 0.636364 | 2.56E-07 |
| Respiratory electron transport, ATP synthesis by chemiosmotic coupling, and heat production by uncoupling proteins. | 0.2926829 | 4.33E-07 | 0.00813008 | 0.99996 | 0.065041 | 0.3008   |
| Dual Incision in GG-NER                                                                                             | 0.4390244 | 5.14E-07 | 0.07317073 | 0.63099 | 0.195122 | 0.001    |
| Resolution of Sister Chromatid Cohesion                                                                             | 0.2903226 | 5.38E-07 | 0.07258065 | 0.63957 | 0.145161 | 6.21E-05 |
| Lagging Strand Synthesis                                                                                            | 0.6       | 6.05E-07 | 0.15       | 0.20178 | 0.4      | 3.44E-06 |
| Transcriptional Regulation by TP53                                                                                  | 0.2136986 | 6.58E-07 | 0.08767123 | 0.26996 | 0.084932 | 0.00423  |
| Amplification of signal from the kinetochores                                                                       | 0.3125    | 8.53E-07 | 0.08333333 | 0.47788 | 0.15625  | 0.00011  |
| Amplification of signal from unattached kinetochores via a MAD2 inhibitory signal                                   | 0.3125    | 8.53E-07 | 0.08333333 | 0.47788 | 0.15625  | 0.00011  |
| M Phase                                                                                                             | 0.2086514 | 9.54E-07 | 0.05089059 | 0.98787 | 0.096692 | 0.00013  |
| Mitotic Prometaphase                                                                                                | 0.2474747 | 1.13E-06 | 0.07575758 | 0.58778 | 0.121212 | 8.13E-05 |
| Transcription-Coupled Nucleotide Excision Repair (TC-NER)                                                           | 0.3291139 | 1.52E-06 | 0.07594937 | 0.589   | 0.164557 | 0.00018  |
| Mitotic Metaphase and Anaphase                                                                                      | 0.245     | 1.55E-06 | 0.05       | 0.95573 | 0.12     | 9.54E-05 |
| Dual incision in TC-NER                                                                                             | 0.3484848 | 1.99E-06 | 0.07575758 | 0.59451 | 0.166667 | 0.0005   |
| mRNA Splicing                                                                                                       | 0.2460733 | 2.21E-06 | 0.04188482 | 0.98501 | 0.104712 | 0.00199  |
| Resolution of D-loop Structures through Holliday Junction Intermediates                                             | 0.4545455 | 2.70E-06 | 0.24242424 | 0.00319 | 0.212121 | 0.00123  |
| tRNA processing                                                                                                     | 0.2924528 | 2.75E-06 | 0.08490566 | 0.44757 | 0.103774 | 0.02043  |
| Mitochondrial Fatty Acid Beta-Oxidation                                                                             | 0.4324324 | 2.83E-06 | 0.16216216 | 0.06475 | 0.108108 | 0.12111  |
| Mitotic Anaphase                                                                                                    | 0.241206  | 3.16E-06 | 0.05025126 | 0.9539  | 0.115578 | 0.00023  |
| Resolution of D-loop Structures through Synthesis-Dependent Strand Annealing (SDSA)                                 | 0.5       | 3.35E-06 | 0.26923077 | 0.00304 | 0.230769 | 0.00173  |
| Regulation of TP53 Activity through Phosphorylation                                                                 | 0.3043478 | 3.52E-06 | 0.11956522 | 0.10224 | 0.130435 | 0.0026   |

|                                                                              |           |          |            |         |          |          |
|------------------------------------------------------------------------------|-----------|----------|------------|---------|----------|----------|
| mRNA Splicing - Major Pathway                                                | 0.2459016 | 3.69E-06 | 0.03825137 | 0.99082 | 0.103825 | 0.00281  |
| Resolution of D-Loop Structures                                              | 0.4411765 | 4.29E-06 | 0.26470588 | 0.00091 | 0.205882 | 0.00148  |
| Gap-filling DNA repair synthesis and ligation in TC-NER                      | 0.3384615 | 5.73E-06 | 0.09230769 | 0.39762 | 0.184615 | 0.0001   |
| Recognition of DNA damage by PCNA-containing replication complex             | 0.4516129 | 6.42E-06 | 0.06451613 | 0.70876 | 0.290323 | 1.75E-05 |
| Nucleotide Excision Repair                                                   | 0.2792793 | 7.89E-06 | 0.06306306 | 0.77349 | 0.144144 | 0.00017  |
| Separation of Sister Chromatids                                              | 0.2393617 | 7.90E-06 | 0.05319149 | 0.92904 | 0.111702 | 0.00068  |
| Fanconi Anemia Pathway                                                       | 0.4       | 9.61E-06 | 0.15       | 0.08801 | 0.2      | 0.00084  |
| Mitochondrial tRNA aminoacylation                                            | 0.5238095 | 1.09E-05 | 0.0952381  | 0.49621 | 0.142857 | 0.09095  |
| PCNA-Dependent Long Patch Base Excision Repair                               | 0.5238095 | 1.09E-05 | 0.14285714 | 0.22272 | 0.333333 | 5.74E-05 |
| Mismatch Repair                                                              | 0.6       | 1.67E-05 | 0.06666667 | 0.70483 | 0.4      | 6.12E-05 |
| Processive synthesis on the lagging strand                                   | 0.6       | 1.67E-05 | 0.13333333 | 0.32934 | 0.333333 | 0.0007   |
| Global Genome Nucleotide Excision Repair (GG-NER)                            | 0.297619  | 1.78E-05 | 0.05952381 | 0.79517 | 0.154762 | 0.00034  |
| E2F mediated regulation of DNA replication                                   | 0.5       | 1.94E-05 | 0.13636364 | 0.24407 | 0.318182 | 8.05E-05 |
| Switching of origins to a post-replicative state                             | 0.2888889 | 2.19E-05 | 0.03333333 | 0.9756  | 0.166667 | 5.03E-05 |
| Resolution of AP sites via the multiple-nucleotide patch replacement pathway | 0.4615385 | 2.27E-05 | 0.11538462 | 0.3316  | 0.307692 | 3.24E-05 |
| Metabolism of nucleotides                                                    | 0.2772277 | 2.48E-05 | 0.07920792 | 0.53664 | 0.079208 | 0.14933  |
| snRNP Assembly                                                               | 0.3461538 | 2.84E-05 | 0.01923077 | 0.98556 | 0.192308 | 0.00027  |
| Metabolism of non-coding RNA                                                 | 0.3461538 | 2.84E-05 | 0.01923077 | 0.98556 | 0.192308 | 0.00027  |
| Branched-chain amino acid catabolism                                         | 0.4782609 | 3.31E-05 | 0.08695652 | 0.54578 | 0.173913 | 0.02832  |
| Interactions of Rev with host cellular proteins                              | 0.4       | 3.47E-05 | 0.02857143 | 0.94215 | 0.171429 | 0.00825  |
| Protein localization                                                         | 0.2519685 | 5.47E-05 | 0.03937008 | 0.97427 | 0.03937  | 0.79049  |
| Complex I biogenesis                                                         | 0.3272727 | 6.65E-05 | NA         | NA      | 0.090909 | 0.15234  |
| SUMOylation                                                                  | 0.2245989 | 7.74E-05 | 0.0855615  | 0.3888  | 0.085561 | 0.03204  |
| Rev-mediated nuclear export of HIV RNA                                       | 0.3939394 | 7.97E-05 | 0.03030303 | 0.9319  | 0.181818 | 0.00614  |
| Methylation                                                                  | 0.5714286 | 8.20E-05 | 0.28571429 | 0.0196  | 0.142857 | 0.16054  |
| Mismatch repair (MMR) directed by MSH2:MSH6 (MutSalpha)                      | 0.5714286 | 8.20E-05 | 0.07142857 | 0.6798  | 0.428571 | 3.84E-05 |
| Mismatch repair (MMR) directed by MSH2:MSH3 (MutSbeta)                       | 0.5714286 | 8.20E-05 | 0.07142857 | 0.6798  | 0.357143 | 0.00048  |
| Removal of the Flap Intermediate                                             | 0.5714286 | 8.20E-05 | 0.07142857 | 0.6798  | 0.285714 | 0.00462  |
| Gap-filling DNA repair synthesis and ligation in GG-NER                      | 0.44      | 8.61E-05 | 0.12       | 0.30956 | 0.28     | 0.0002   |
| Viral Messenger RNA Synthesis                                                | 0.3571429 | 8.67E-05 | 0.02380952 | 0.96733 | 0.166667 | 0.0052   |
| SUMOylation of DNA damage response and repair proteins                       | 0.2894737 | 8.89E-05 | 0.05263158 | 0.85456 | 0.105263 | 0.04126  |
| rRNA modification in the nucleus and cytosol                                 | 0.3064516 | 0.00011  | 0.0483871  | 0.87249 | 0.080645 | 0.21429  |

|                                                                  |           |         |            |         |          |          |
|------------------------------------------------------------------|-----------|---------|------------|---------|----------|----------|
| NEP/NS2 Interacts with the Cellular Export Machinery             | 0.4       | 0.00013 | 0.03333333 | 0.91303 | 0.2      | 0.00375  |
| Base Excision Repair                                             | 0.3589744 | 0.00014 | 0.17948718 | 0.02939 | 0.230769 | 0.00013  |
| Resolution of Abasic Sites (AP sites)                            | 0.3589744 | 0.00014 | 0.17948718 | 0.02939 | 0.230769 | 0.00013  |
| Regulation of HSF1-mediated heat shock response                  | 0.2941176 | 0.00014 | 0.05882353 | 0.78812 | 0.132353 | 0.00784  |
| Assembly of the pre-replicative complex                          | 0.2941176 | 0.00014 | 0.05882353 | 0.78812 | 0.205882 | 7.40E-06 |
| Peroxisomal protein import                                       | 0.3015873 | 0.00015 | 0.07936508 | 0.55228 | 0.047619 | 0.6374   |
| Nucleobase biosynthesis                                          | 0.5333333 | 0.00016 | 0.13333333 | 0.32934 | 0.133333 | 0.17924  |
| SUMO E3 ligases SUMOylate target proteins                        | 0.2209945 | 0.00016 | 0.08839779 | 0.3392  | 0.082873 | 0.04695  |
| DNA Damage Bypass                                                | 0.3265306 | 0.00017 | 0.06122449 | 0.74767 | 0.183673 | 0.00078  |
| Deposition of new CENPA-containing nucleosomes at the centromere | 0.2837838 | 0.00017 | 0.04054054 | 0.93564 | 0.108108 | 0.03602  |
| Nucleosome assembly                                              | 0.2837838 | 0.00017 | 0.04054054 | 0.93564 | 0.108108 | 0.03602  |
| Meiosis                                                          | 0.2457627 | 0.00019 | 0.05084746 | 0.90711 | 0.101695 | 0.01838  |
| G0 and Early G1                                                  | 0.4074074 | 0.0002  | 0.07407407 | 0.63431 | 0.222222 | 0.00213  |
| DNA Damage/Telomere Stress Induced Senescence                    | 0.275     | 0.0002  | 0.0625     | 0.75875 | 0.1      | 0.05322  |
| TP53 Regulates Transcription of DNA Repair Genes                 | 0.2923077 | 0.00023 | 0.07692308 | 0.58068 | 0.153846 | 0.00168  |
| Pyruvate metabolism and Citric Acid (TCA) cycle                  | 0.3090909 | 0.00023 | 0.07272727 | 0.63188 | 0.018182 | 0.94597  |
| Transport of Mature mRNAs Derived from Intronless Transcripts    | 0.3414634 | 0.00026 | 0.02439024 | 0.96455 | 0.195122 | 0.001    |
| Export of Viral Ribonucleoproteins from Nucleus                  | 0.375     | 0.00026 | 0.0625     | 0.72526 | 0.1875   | 0.00525  |
| Nuclear import of Rev protein                                    | 0.375     | 0.00026 | 0.03125    | 0.92612 | 0.15625  | 0.02269  |
| Termination of translesion DNA synthesis                         | 0.375     | 0.00026 | 0.09375    | 0.46112 | 0.1875   | 0.00525  |
| Orc1 removal from chromatin                                      | 0.2816901 | 0.00027 | 0.02816901 | 0.97846 | 0.183099 | 5.80E-05 |
| RHO GTPases Activate Formins                                     | 0.2318841 | 0.00029 | 0.07246377 | 0.644   | 0.123188 | 0.00072  |
| tRNA processing in the nucleus                                   | 0.3035714 | 0.00029 | 0.05357143 | 0.82376 | 0.142857 | 0.00756  |
| Cellular response to heat stress                                 | 0.2613636 | 0.00033 | 0.07954545 | 0.53674 | 0.113636 | 0.01481  |
| mRNA Splicing - Minor Pathway                                    | 0.3076923 | 0.00037 | 0.03846154 | 0.92164 | 0.173077 | 0.00121  |
| Translesion synthesis by POLI                                    | 0.4705882 | 0.00047 | 0.11764706 | 0.3875  | 0.294118 | 0.00132  |
| Transport of the SLBP Dependant Mature mRNA                      | 0.3529412 | 0.0005  | 0.02941176 | 0.93724 | 0.176471 | 0.00714  |
| Nuclear Pore Complex (NPC) Disassembly                           | 0.3529412 | 0.0005  | 0.02941176 | 0.93724 | 0.176471 | 0.00714  |
| Transport of Ribonucleoproteins into the Host Nucleus            | 0.3666667 | 0.00059 | 0.03333333 | 0.91303 | 0.166667 | 0.01746  |
| Regulation of Glucokinase by Glucokinase Regulatory Protein      | 0.3666667 | 0.00059 | 0.03333333 | 0.91303 | 0.166667 | 0.01746  |
| Calnexin/calreticulin cycle                                      | 0.3846154 | 0.00067 | 0.07692308 | 0.61352 | 0.076923 | 0.3906   |
| N-glycan trimming in the ER and Calnexin/Calreticulin cycle      | 0.3428571 | 0.00067 | 0.08571429 | 0.52185 | 0.085714 | 0.26887  |
| Polymerase switching on the C-strand of the telomere             | 0.5       | 0.00069 | 0.14285714 | 0.29966 | 0.357143 | 0.00048  |

|                                                                                                          |           |         |            |         |          |         |
|----------------------------------------------------------------------------------------------------------|-----------|---------|------------|---------|----------|---------|
| Polymerase switching                                                                                     | 0.5       | 0.00069 | 0.14285714 | 0.29966 | 0.357143 | 0.00048 |
| Leading Strand Synthesis                                                                                 | 0.5       | 0.00069 | 0.14285714 | 0.29966 | 0.357143 | 0.00048 |
| Transport of Mature mRNA Derived from an Intronless Transcript                                           | 0.325     | 0.00073 | 0.025      | 0.96153 | 0.175    | 0.00393 |
| Defects in vitamin and cofactor metabolism                                                               | 0.4090909 | 0.00074 | 0.13636364 | 0.24407 | NA       | NA      |
| Pyruvate metabolism                                                                                      | 0.3548387 | 0.00081 | 0.09677419 | 0.44014 | NA       | NA      |
| Diseases of metabolism                                                                                   | 0.2380952 | 0.00085 | 0.1047619  | 0.19544 | NA       | NA      |
| Glutathione conjugation                                                                                  | 0.3333333 | 0.0009  | 0.02777778 | 0.94669 | 0.111111 | 0.11233 |
| Mitotic Prophase                                                                                         | 0.2198582 | 0.00094 | 0.02836879 | 0.99636 | 0.099291 | 0.01389 |
| Processive synthesis on the C-strand of the telomere                                                     | 0.5454545 | 0.00095 | 0.09090909 | 0.59125 | 0.363636 | 0.00172 |
| SeMet incorporation into proteins                                                                        | 0.5454545 | 0.00095 | NA         | NA      | NA       | NA      |
| mitochondrial fatty acid beta-oxidation of saturated fatty acids                                         | 0.5454545 | 0.00095 | 0.09090909 | 0.59125 | 0.181818 | 0.10721 |
| Nuclear Envelope Breakdown                                                                               | 0.2941176 | 0.00095 | 0.03921569 | 0.91631 | 0.156863 | 0.00424 |
| Regulation of TP53 Activity                                                                              | 0.2125    | 0.00103 | 0.09375    | 0.26685 | 0.08125  | 0.06956 |
| Vpr-mediated nuclear import of PICs                                                                      | 0.34375   | 0.00109 | 0.03125    | 0.92612 | 0.15625  | 0.02269 |
| Translesion Synthesis by POLH                                                                            | 0.4210526 | 0.00116 | 0.05263158 | 0.78688 | 0.263158 | 0.00227 |
| Transcription of E2F targets under negative control by DREAM complex                                     | 0.4210526 | 0.00116 | 0.10526316 | 0.44333 | 0.263158 | 0.00227 |
| Transport of the SLBP independent Mature mRNA                                                            | 0.3333333 | 0.00146 | 0.03030303 | 0.9319  | 0.151515 | 0.02565 |
| SUMOylation of SUMOylation proteins                                                                      | 0.3333333 | 0.00146 | 0.03030303 | 0.9319  | 0.151515 | 0.02565 |
| Meiotic recombination                                                                                    | 0.244186  | 0.00153 | 0.03488372 | 0.96874 | 0.081395 | 0.15434 |
| Cytosolic tRNA aminoacylation                                                                            | 0.375     | 0.00154 | 0.04166667 | 0.85818 | NA       | NA      |
| Formation of Incision Complex in GG-NER                                                                  | 0.3023256 | 0.00155 | 0.02325581 | 0.96989 | 0.116279 | 0.06868 |
| Purine ribonucleoside monophosphate biosynthesis                                                         | 0.5       | 0.0017  | 0.16666667 | 0.23983 | 0.083333 | 0.47027 |
| Metabolism of cofactors                                                                                  | 0.4       | 0.00173 | NA         | NA      | 0.1      | 0.27582 |
| SUMOylation of chromatin organization proteins                                                           | 0.2571429 | 0.00174 | 0.04285714 | 0.91878 | 0.085714 | 0.15116 |
| Formation of TC-NER Pre-Incision Complex                                                                 | 0.2777778 | 0.00181 | 0.05555556 | 0.8043  | 0.111111 | 0.05815 |
| Translesion synthesis by REV1                                                                            | 0.4375    | 0.00183 | 0.0625     | 0.72791 | 0.3125   | 0.00097 |
| Transcription of E2F targets under negative control by p107 (RBL1) and p130 (RBL2) in complex with HDAC1 | 0.4375    | 0.00183 | 0.125      | 0.35866 | 0.1875   | 0.0462  |
| Transcriptional regulation by small RNAs                                                                 | 0.2285714 | 0.00195 | 0.00952381 | 0.99981 | 0.095238 | 0.04391 |
| Translesion synthesis by Y family DNA polymerases bypasses lesions on DNA template                       | 0.3076923 | 0.00197 | 0.07692308 | 0.5966  | 0.153846 | 0.01395 |
| Transport of Mature Transcript to Cytoplasm                                                              | 0.2409639 | 0.00233 | 0.01204819 | 0.99886 | 0.108434 | 0.02661 |
| Interactions of Vpr with host cellular proteins                                                          | 0.3142857 | 0.00249 | 0.02857143 | 0.94215 | 0.142857 | 0.03227 |

|                                                                                                                             |           |         |            |         |          |          |
|-----------------------------------------------------------------------------------------------------------------------------|-----------|---------|------------|---------|----------|----------|
| ER Quality Control Compartment (ERQC)                                                                                       | 0.3809524 | 0.0025  | 0.04761905 | 0.81892 | 0.095238 | 0.29528  |
| Deadenylation-dependent mRNA decay                                                                                          | 0.2678571 | 0.00267 | 0.05357143 | 0.82376 | 0.017857 | 0.94877  |
| Reproduction                                                                                                                | 0.2083333 | 0.00272 | 0.05555556 | 0.88347 | 0.083333 | 0.06811  |
| Translesion synthesis by POLK                                                                                               | 0.4117647 | 0.00278 | 0.05882353 | 0.74919 | 0.294118 | 0.00132  |
| HIV Life Cycle                                                                                                              | 0.205298  | 0.00296 | 0.05298013 | 0.9115  | 0.099338 | 0.01107  |
| Phase II - Conjugation of compounds                                                                                         | 0.2201835 | 0.0033  | 0.05504587 | 0.86303 | 0.091743 | 0.05424  |
| Cellular responses to stress                                                                                                | 0.1690141 | 0.00341 | 0.05868545 | 0.95153 | 0.075117 | 0.02048  |
| RNA Polymerase I Transcription Initiation                                                                                   | 0.2765957 | 0.00372 | 0.06382979 | 0.72161 | 0.06383  | 0.4393   |
| SUMOylation of ubiquitylation proteins                                                                                      | 0.2972973 | 0.00404 | 0.02702703 | 0.95086 | 0.135135 | 0.03986  |
| Removal of the Flap Intermediate from the C-strand                                                                          | 0.5       | 0.00427 | NA         | NA      | 0.3      | 0.01245  |
| RNA Polymerase I Transcription                                                                                              | 0.2142857 | 0.00475 | 0.02678571 | 0.99406 | 0.0625   | 0.35603  |
| tRNA modification in the nucleus and cytosol                                                                                | 0.2790698 | 0.00483 | 0.13953488 | 0.11525 | 0.069767 | 0.38327  |
| Cellular Senescence                                                                                                         | 0.1897436 | 0.00509 | 0.07179487 | 0.66828 | 0.076923 | 0.07869  |
| Processing of Capped Intronless Pre-mRNA                                                                                    | 0.3214286 | 0.00513 | 0.03571429 | 0.89763 | 0.285714 | 5.88E-05 |
| Fatty acid metabolism                                                                                                       | 0.1920904 | 0.0058  | 0.10734463 | 0.09682 | 0.033898 | 0.89972  |
| SUMOylation of DNA replication proteins                                                                                     | 0.2727273 | 0.00591 | 0.04545455 | 0.86838 | 0.136364 | 0.02434  |
| NS1 Mediated Effects on Host Pathways                                                                                       | 0.2820513 | 0.00628 | 0.02564103 | 0.95826 | 0.128205 | 0.04846  |
| mRNA decay by 5' to 3' exoribonuclease                                                                                      | 0.4       | 0.00663 | 0.06666667 | 0.70483 | 0.066667 | 0.54812  |
| RNA Polymerase I Promoter Clearance                                                                                         | 0.2110092 | 0.00685 | 0.02752294 | 0.99277 | 0.055046 | 0.49453  |
| Meiotic synapsis                                                                                                            | 0.2278481 | 0.00703 | 0.03797468 | 0.95217 | 0.088608 | 0.11196  |
| Establishment of Sister Chromatid Cohesion                                                                                  | 0.4545455 | 0.00703 | 0.09090909 | 0.59125 | 0.090909 | 0.44145  |
| Condensation of Prometaphase Chromosomes                                                                                    | 0.4545455 | 0.00703 | 0.09090909 | 0.59125 | 0.181818 | 0.10721  |
| SLBP Dependent Processing of Replication-Dependent Histone Pre-mRNAs                                                        | 0.4545455 | 0.00703 | NA         | NA      | 0.363636 | 0.00172  |
| Gene Silencing by RNA                                                                                                       | 0.2       | 0.00762 | 0.01481481 | 0.9998  | 0.081481 | 0.08863  |
| Epigenetic regulation of gene expression                                                                                    | 0.1959459 | 0.00781 | 0.02702703 | 0.99766 | 0.081081 | 0.08001  |
| Inhibition of the proteolytic activity of APC/C required for the onset of anaphase by mitotic spindle checkpoint components | 0.35      | 0.00792 | 0.1        | 0.47017 | 0.15     | 0.08092  |
| Inactivation of APC/C via direct inhibition of the APC/C complex                                                            | 0.35      | 0.00792 | 0.1        | 0.47017 | 0.15     | 0.08092  |
| Transport of Mature mRNA derived from an Intron-Containing Transcript                                                       | 0.2297297 | 0.00795 | 0.01351351 | 0.99761 | 0.081081 | 0.18116  |
| APC-Cdc20 mediated degradation of Nek2A                                                                                     | 0.32      | 0.00844 | 0.08       | 0.59184 | 0.12     | 0.13563  |
| Interconversion of nucleotide di- and triphosphates                                                                         | 0.3       | 0.00846 | 0.03333333 | 0.91303 | 0.166667 | 0.01746  |
| SUMOylation of RNA binding proteins                                                                                         | 0.2608696 | 0.00863 | 0.04347826 | 0.88418 | 0.130435 | 0.02965  |

|                                                                             |           |         |            |         |          |         |
|-----------------------------------------------------------------------------|-----------|---------|------------|---------|----------|---------|
| Nonhomologous End-Joining (NHEJ)                                            | 0.2318841 | 0.00899 | 0.05797101 | 0.79758 | 0.057971 | 0.47903 |
| Metabolism of vitamins and cofactors                                        | 0.1851852 | 0.00925 | 0.07936508 | 0.51304 | 0.042328 | 0.76506 |
| Apoptotic execution phase                                                   | 0.25      | 0.00933 | 0.11538462 | 0.21762 | 0.038462 | 0.75662 |
| Host Interactions with Influenza Factors                                    | 0.2682927 | 0.00939 | 0.02439024 | 0.96455 | 0.121951 | 0.05806 |
| Formation of Senescence-Associated Heterochromatin Foci (SAHF)              | 0.375     | 0.00952 | 0.1875     | 0.12408 | 0.1875   | 0.0462  |
| Positive epigenetic regulation of rRNA expression                           | 0.2075472 | 0.00981 | 0.01886792 | 0.99826 | 0.075472 | 0.18002 |
| Late Phase of HIV Life Cycle                                                | 0.1956522 | 0.01022 | 0.05072464 | 0.92156 | 0.101449 | 0.01165 |
| Glyoxylate metabolism and glycine degradation                               | 0.2903226 | 0.01064 | 0.06451613 | 0.70876 | 0.064516 | 0.47976 |
| Tetrahydrobiopterin (BH4) synthesis, recycling, salvage and regulation      | 0.4166667 | 0.01084 | NA         | NA      | 0.083333 | 0.47027 |
| Ethanol oxidation                                                           | 0.4166667 | 0.01084 | 0.16666667 | 0.23983 | 0.083333 | 0.47027 |
| Cyclin E associated events during G1/S transition                           | 0.2168675 | 0.01183 | 0.06024096 | 0.78649 | 0.120482 | 0.01002 |
| RNA Polymerase I Chain Elongation                                           | 0.2111111 | 0.01314 | 0.01111111 | 0.99936 | 0.077778 | 0.18144 |
| Metabolism of nitric oxide                                                  | 0.3529412 | 0.01319 | 0.05882353 | 0.74919 | 0.058824 | 0.59357 |
| eNOS activation and regulation                                              | 0.3529412 | 0.01319 | 0.05882353 | 0.74919 | 0.058824 | 0.59357 |
| RNA Polymerase I Transcription Termination                                  | 0.28125   | 0.01321 | 0.03125    | 0.92612 | 0.09375  | 0.22679 |
| RNA Pol II CTD phosphorylation and interaction with CE during HIV infection | 0.2962963 | 0.01384 | 0.03703704 | 0.88894 | 0.148148 | 0.04779 |
| RNA Pol II CTD phosphorylation and interaction with CE                      | 0.2962963 | 0.01384 | 0.03703704 | 0.88894 | 0.148148 | 0.04779 |
| Citric acid cycle (TCA cycle)                                               | 0.3181818 | 0.01397 | NA         | NA      | 0.045455 | 0.68821 |
| Cyclin A:Cdk2-associated events at S phase entry                            | 0.2117647 | 0.01505 | 0.05882353 | 0.80357 | 0.117647 | 0.01177 |
| Metabolism of water-soluble vitamins and cofactors                          | 0.195122  | 0.01534 | 0.08130081 | 0.49513 | 0.02439  | 0.9564  |
| Cleavage of Growing Transcript in the Termination Region                    | 0.2238806 | 0.01546 | 0.01492537 | 0.99576 | 0.134328 | 0.00712 |
| RNA Polymerase II Transcription Termination                                 | 0.2238806 | 0.01546 | 0.01492537 | 0.99576 | 0.134328 | 0.00712 |
| Biological oxidations                                                       | 0.1748879 | 0.01582 | 0.07623318 | 0.57807 | 0.058296 | 0.36416 |
| Apoptosis induced DNA fragmentation                                         | 0.3846154 | 0.01584 | NA         | NA      | NA       | NA      |
| The activation of arylsulfatases                                            | 0.3846154 | 0.01584 | 0.30769231 | 0.01491 | 0.230769 | 0.02645 |
| eNOS activation                                                             | 0.3846154 | 0.01584 | NA         | NA      | 0.076923 | 0.4976  |
| Activation of DNA fragmentation factor                                      | 0.3846154 | 0.01584 | NA         | NA      | NA       | NA      |
| Synthesis of PC                                                             | 0.2857143 | 0.01732 | 0.21428571 | 0.01895 | 0.071429 | 0.42717 |
| Synthesis of IP3 and IP4 in the cytosol                                     | 0.2857143 | 0.01732 | 0.21428571 | 0.01895 | NA       | NA      |
| Condensation of Prophase Chromosomes                                        | 0.2162162 | 0.01749 | 0.01351351 | 0.99761 | 0.067568 | 0.33375 |
| RNA Polymerase III Chain Elongation                                         | 0.3333333 | 0.01776 | 0.05555556 | 0.7688  | 0.166667 | 0.06243 |

|                                                                                                           |           |         |            |         |          |         |
|-----------------------------------------------------------------------------------------------------------|-----------|---------|------------|---------|----------|---------|
| Protein folding                                                                                           | 0.2020202 | 0.01781 | 0.06060606 | 0.79514 | 0.131313 | 0.00165 |
| Gamma carboxylation, hypusine formation and arylsulfatase activation                                      | 0.2564103 | 0.0179  | 0.15384615 | 0.07981 | 0.153846 | 0.01395 |
| Association of TriC/CCT with target proteins during biosynthesis                                          | 0.2564103 | 0.0179  | 0.07692308 | 0.5966  | 0.102564 | 0.13952 |
| APC/C:Cdc20 mediated degradation of Cyclin B                                                              | 0.3043478 | 0.01798 | 0.04347826 | 0.84614 | 0.130435 | 0.11243 |
| BBSome-mediated cargo-targeting to cilium                                                                 | 0.3043478 | 0.01798 | 0.13043478 | 0.26571 | 0.086957 | 0.33392 |
| Mitochondrial calcium ion transport                                                                       | 0.3043478 | 0.01798 | 0.04347826 | 0.84614 | NA       | NA      |
| RHO GTPase Effectors                                                                                      | 0.164557  | 0.01898 | 0.06329114 | 0.86626 | 0.072785 | 0.05963 |
| NoRC negatively regulates rRNA expression                                                                 | 0.1981132 | 0.01904 | 0.00943396 | 0.99983 | 0.075472 | 0.18002 |
| Metabolism of carbohydrates                                                                               | 0.1672727 | 0.02011 | 0.10545455 | 0.05925 | 0.069091 | 0.11842 |
| Peroxisomal lipid metabolism                                                                              | 0.2758621 | 0.02139 | 0.17241379 | 0.07123 | 0.068966 | 0.44502 |
| Mitophagy                                                                                                 | 0.2758621 | 0.02139 | 0.03448276 | 0.90565 | 0.034483 | 0.78493 |
| mRNA Capping                                                                                              | 0.2758621 | 0.02139 | 0.03448276 | 0.90565 | 0.137931 | 0.05972 |
| Glycogen metabolism                                                                                       | 0.2758621 | 0.02139 | 0.17241379 | 0.07123 | NA       | NA      |
| Defects in cobalamin (B12) metabolism                                                                     | 0.3571429 | 0.02218 | 0.14285714 | 0.29966 | NA       | NA      |
| TP53 Regulates Transcription of Genes Involved in G1 Cell Cycle Arrest                                    | 0.3571429 | 0.02218 | 0.14285714 | 0.29966 | 0.071429 | 0.52353 |
| Recruitment and ATM-mediated phosphorylation of repair and signaling proteins at DNA double strand breaks | 0.2105263 | 0.02225 | 0.05263158 | 0.85456 | 0.065789 | 0.35445 |
| Glycolysis                                                                                                | 0.2142857 | 0.02267 | 0.07142857 | 0.64719 | 0.114286 | 0.02692 |
| Phosphorylation of the APC/C                                                                              | 0.3157895 | 0.02329 | 0.05263158 | 0.78688 | 0.157895 | 0.07141 |
| Protein methylation                                                                                       | 0.3157895 | 0.02329 | NA         | NA      | 0.105263 | 0.25633 |
| Transcriptional Regulation by E2F6                                                                        | 0.2571429 | 0.02369 | 0.08571429 | 0.52185 | 0.142857 | 0.03227 |
| DNA Double Strand Break Response                                                                          | 0.2077922 | 0.02496 | 0.05194805 | 0.86147 | 0.064935 | 0.36482 |
| Negative epigenetic regulation of rRNA expression                                                         | 0.1926606 | 0.02544 | 0.00917431 | 0.99986 | 0.073394 | 0.19966 |
| RNA Polymerase I Promoter Escape                                                                          | 0.2666667 | 0.0261  | 0.03333333 | 0.91303 | 0.1      | 0.19951 |
| SLBP independent Processing of Histone Pre-mRNAs                                                          | 0.4       | 0.02662 | NA         | NA      | 0.3      | 0.01245 |
| Cohesin Loading onto Chromatin                                                                            | 0.4       | 0.02662 | 0.1        | 0.55659 | 0.1      | 0.41106 |
| Folding of actin by CCT/TriC                                                                              | 0.4       | 0.02662 | NA         | NA      | 0.1      | 0.41106 |
| HDR through MMEJ (alt-NHEJ)                                                                               | 0.4       | 0.02662 | NA         | NA      | 0.1      | 0.41106 |
| Ketone body metabolism                                                                                    | 0.4       | 0.02662 | 0.2        | 0.18074 | 0.3      | 0.01245 |
| Pentose phosphate pathway                                                                                 | 0.3333333 | 0.02995 | NA         | NA      | 0.066667 | 0.54812 |
| Neutrophil degranulation                                                                                  | 0.1524008 | 0.03375 | 0.07098121 | 0.74771 | 0.052192 | 0.50449 |
| TP53 Regulates Transcription of Cell Cycle Genes                                                          | 0.2244898 | 0.03454 | 0.08163265 | 0.53897 | 0.081633 | 0.24487 |

|                                                                 |           |         |            |         |          |         |
|-----------------------------------------------------------------|-----------|---------|------------|---------|----------|---------|
| Cellular responses to external stimuli                          | 0.1510934 | 0.03657 | 0.05964215 | 0.95623 | 0.063618 | 0.12619 |
| Biotin transport and metabolism                                 | 0.3636364 | 0.03782 | 0.09090909 | 0.59125 | NA       | NA      |
| Apoptotic cleavage of cell adhesion proteins                    | 0.3636364 | 0.03782 | 0.09090909 | 0.59125 | 0.090909 | 0.44145 |
| Organelle biogenesis and maintenance                            | 0.1598639 | 0.03881 | 0.0952381  | 0.15783 | 0.07483  | 0.0505  |
| Apoptotic cleavage of cellular proteins                         | 0.2368421 | 0.03904 | 0.13157895 | 0.17165 | 0.052632 | 0.59017 |
| mRNA decay by 3' to 5' exoribonuclease                          | 0.3125    | 0.03925 | NA         | NA      | NA       | NA      |
| Processing of SMDT1                                             | 0.3125    | 0.03925 | 0.0625     | 0.72791 | NA       | NA      |
| ERCC6 (CSB) and EHMT2 (G9a) positively regulate rRNA expression | 0.1973684 | 0.04425 | 0.02631579 | 0.98482 | 0.052632 | 0.55571 |
| Formation of the Early Elongation Complex                       | 0.2424242 | 0.04439 | 0.06060606 | 0.74097 | 0.090909 | 0.24069 |
| Formation of the HIV-1 Early Elongation Complex                 | 0.2424242 | 0.04439 | 0.06060606 | 0.74097 | 0.090909 | 0.24069 |
| Pink/Parkin Mediated Mitophagy                                  | 0.2727273 | 0.04643 | NA         | NA      | 0.045455 | 0.68821 |
| Mitochondrial protein import                                    | 0.203125  | 0.04786 | NA         | NA      | 0.03125  | 0.84941 |
| Signaling by Nuclear Receptors                                  | 0.1658291 | 0.04846 | 0.08040201 | 0.4894  | 0.045226 | 0.70407 |
| Glucose metabolism                                              | 0.1888889 | 0.0488  | 0.07777778 | 0.56112 | 0.088889 | 0.09201 |
| Nuclear Receptor transcription pathway                          | 0.12      | 0.59818 | 0.24       | 0.00036 | 0.06     | 0.48001 |
| G alpha (12/13) signalling events                               | 0.0759494 | 0.93786 | 0.17721519 | 0.00294 | 0.063291 | 0.38558 |
| Sema4D induced cell migration and growth-cone collapse          | 0.0952381 | 0.75361 | 0.28571429 | 0.00436 | NA       | NA      |
| Rho GTPase cycle                                                | 0.1014493 | 0.82484 | 0.14492754 | 0.00511 | 0.028986 | 0.93042 |
| Hydrolysis of LPC                                               | 0.1       | 0.73386 | 0.4        | 0.00529 | NA       | NA      |
| NRAGE signals death through JNK                                 | 0.0677966 | 0.94527 | 0.18644068 | 0.00537 | 0.050847 | 0.59268 |
| HS-GAG degradation                                              | 0.0909091 | 0.77649 | 0.27272727 | 0.0056  | 0.090909 | 0.31466 |
| Metabolism of lipids                                            | 0.1316147 | 0.27221 | 0.10312076 | 0.00669 | 0.040706 | 0.93264 |
| Sema4D in semaphorin signaling                                  | 0.08      | 0.83431 | 0.24       | 0.01087 | NA       | NA      |
| Phospholipid metabolism                                         | 0.1367925 | 0.31267 | 0.12264151 | 0.01417 | 0.042453 | 0.77119 |
| Inositol phosphate metabolism                                   | 0.2       | 0.08355 | 0.18       | 0.01417 | 0.02     | 0.92951 |
| Cell death signalling via NRAGE, NRIF and NADE                  | 0.0789474 | 0.92224 | 0.15789474 | 0.01418 | 0.039474 | 0.7583  |
| Diseases of carbohydrate metabolism                             | 0.1764706 | 0.23979 | 0.20588235 | 0.0144  | NA       | NA      |
| p75 NTR receptor-mediated signalling                            | 0.0824742 | 0.92611 | 0.1443299  | 0.01801 | 0.030928 | 0.88306 |
| Acyl chain remodelling of PC                                    | 0.1071429 | 0.69215 | 0.21428571 | 0.01895 | NA       | NA      |
| Stimuli-sensing channels                                        | 0.0917431 | 0.8828  | 0.13761468 | 0.02192 | 0.045872 | 0.66834 |
| Glycerophospholipid biosynthesis                                | 0.1705426 | 0.07355 | 0.13178295 | 0.02269 | 0.054264 | 0.50009 |
| Chromatin modifying enzymes                                     | 0.1418182 | 0.20418 | 0.11272727 | 0.02412 | 0.069091 | 0.11842 |
| Chromatin organization                                          | 0.1418182 | 0.20418 | 0.11272727 | 0.02412 | 0.069091 | 0.11842 |

|                                                                     |           |         |            |         |          |         |
|---------------------------------------------------------------------|-----------|---------|------------|---------|----------|---------|
| Laminin interactions                                                | 0.0666667 | 0.9013  | 0.2        | 0.02616 | 0.1      | 0.19951 |
| Glycogen storage diseases                                           | 0.1875    | 0.31796 | 0.25       | 0.03148 | NA       | NA      |
| Ion channel transport                                               | 0.0913978 | 0.93436 | 0.11827957 | 0.03267 | 0.032258 | 0.92293 |
| Base-Excision Repair, AP Site Formation                             | 0.2       | 0.357   | 0.3        | 0.03757 | 0.1      | 0.41106 |
| Sphingolipid metabolism                                             | 0.1797753 | 0.07925 | 0.13483146 | 0.04329 | 0.078652 | 0.17448 |
| Circadian Clock                                                     | 0.0571429 | 0.97995 | 0.14285714 | 0.04427 | 0.028571 | 0.88257 |
| Synthesis of glycosylphosphatidylinositol (GPI)                     | 0.2777778 | 0.06254 | 0.22222222 | 0.04677 | 0.055556 | 0.61455 |
| Bile acid and bile salt metabolism                                  | 0.1395349 | 0.44534 | 0.1627907  | 0.04711 | 0.046512 | 0.65777 |
| Death Receptor Signalling                                           | 0.070922  | 0.98553 | 0.12056738 | 0.04776 | 0.028369 | 0.93732 |
| GAB1 signalosome                                                    | NA        | NA      | 0.27272727 | 0.04873 | NA       | NA      |
| CYP2E1 reactions                                                    | 0.0909091 | 0.76688 | 0.27272727 | 0.04873 | NA       | NA      |
| Mucopolysaccharidoses                                               | 0.1818182 | 0.40371 | 0.27272727 | 0.04873 | NA       | NA      |
| Type I hemidesmosome assembly                                       | NA        | NA      | 0.27272727 | 0.04873 | NA       | NA      |
| RHO GTPases activate KTN1                                           | NA        | NA      | 0.27272727 | 0.04873 | NA       | NA      |
| Chk1/Chk2(Cds1) mediated inactivation of Cyclin B:Cdk1 complex      | 0.3076923 | 0.06706 | NA         | NA      | 0.384615 | 0.00033 |
| Chaperonin-mediated protein folding                                 | 0.1827957 | 0.0634  | 0.06451613 | 0.74339 | 0.129032 | 0.00285 |
| Intraflagellar transport                                            | 0.2115385 | 0.05088 | 0.09615385 | 0.38323 | 0.153846 | 0.00479 |
| Polo-like kinase mediated events                                    | 0.25      | 0.12697 | 0.0625     | 0.72791 | 0.25     | 0.00774 |
| Cyclin A/B1/B2 associated events during G2/M transition             | 0.24      | 0.08017 | NA         | NA      | 0.2      | 0.00804 |
| MASTL Facilitates Mitotic Progression                               | 0.2       | 0.357   | NA         | NA      | 0.3      | 0.01245 |
| Cilium Assembly                                                     | 0.1507538 | 0.14706 | 0.09045226 | 0.29125 | 0.090452 | 0.01441 |
| Processing of Intronless Pre-mRNAs                                  | 0.2105263 | 0.20225 | 0.05263158 | 0.78688 | 0.210526 | 0.01458 |
| Cooperation of PDCL (PhLP1) and TRiC/CCT in G-protein beta folding  | 0.2142857 | 0.06839 | 0.07142857 | 0.64741 | 0.142857 | 0.01971 |
| Thrombin signalling through proteinase activated receptors (PARs)   | 0.03125   | 0.9856  | 0.0625     | 0.72526 | 0.15625  | 0.02269 |
| Cyclin D associated events in G1                                    | 0.2045455 | 0.08714 | 0.11363636 | 0.25764 | 0.136364 | 0.02434 |
| G1 Phase                                                            | 0.2045455 | 0.08714 | 0.11363636 | 0.25764 | 0.136364 | 0.02434 |
| ADP signalling through P2Y purinoceptor 12                          | 0.0909091 | 0.77649 | 0.04545455 | 0.83308 | 0.181818 | 0.02436 |
| CDT1 association with the CDC6:ORC:origin complex                   | 0.2033898 | 0.05541 | 0.01694915 | 0.99185 | 0.118644 | 0.03117 |
| HIV Transcription Initiation                                        | 0.212766  | 0.05893 | 0.04255319 | 0.8914  | 0.12766  | 0.03256 |
| RNA Polymerase II HIV Promoter Escape                               | 0.212766  | 0.05893 | 0.04255319 | 0.8914  | 0.12766  | 0.03256 |
| RNA Polymerase II Promoter Escape                                   | 0.212766  | 0.05893 | 0.04255319 | 0.8914  | 0.12766  | 0.03256 |
| RNA Polymerase II Transcription Pre-Initiation And Promoter Opening | 0.212766  | 0.05893 | 0.04255319 | 0.8914  | 0.12766  | 0.03256 |

|                                                                   |           |         |            |         |          |         |
|-------------------------------------------------------------------|-----------|---------|------------|---------|----------|---------|
| RNA Polymerase II Transcription Initiation                        | 0.212766  | 0.05893 | 0.04255319 | 0.8914  | 0.12766  | 0.03256 |
| RNA Polymerase II Transcription Initiation And Promoter Clearance | 0.212766  | 0.05893 | 0.04255319 | 0.8914  | 0.12766  | 0.03256 |
| Cytosolic sulfonation of small molecules                          | 0.0833333 | 0.81673 | 0.04166667 | 0.85818 | 0.166667 | 0.03264 |
| Transcription of the HIV genome                                   | 0.1643836 | 0.18777 | 0.04109589 | 0.93175 | 0.109589 | 0.03358 |
| Prefoldin mediated transfer of substrate to CCT/TriC              | 0.2307692 | 0.09381 | NA         | NA      | 0.153846 | 0.04238 |
